# Supplementary material for: Epigenome Wide Association and Stochastic Epigenetic Mutation Analysis on Cord Blood of Preterm Birth
Source: Int J Mol Sci. 2020 Jul 17;21(14):5044. doi: 10.3390/ijms21145044 (PMC7403978; doi:10.3390/ijms21145044)
Supplement: Supplementary file 1 [file ijms-21-05044-s001.zip]

Archive with 5 entries (5 files):
- Supplemenary table S1.xlsx
- Supplementary Figure S1.pdf
- Supplementary Figure S2.pdf
- Supplementary Table S3.xlsx
- Supplementary_TableS2.xlsx
