# Supplementary material for: Epigenome Wide Association and Stochastic Epigenetic Mutation Analysis on Cord Blood of Preterm Birth
Source: Int J Mol Sci. 2020 Jul 17;21(14):5044. doi: 10.3390/ijms21145044 (PMC7403978; doi:10.3390/ijms21145044)
Supplement: Supplementary file 1 [file ijms-21-05044-s001.zip › Supplemenary table S1.xlsx]

## Sheet: Supplemenary table 1
id	cgid	Chromosome	Start	Strand	mean.0	mean.1	mean.diff	mean.quot.log2	diffmeth.p.val	max.0	min.0	sd.0	max.1	min.1	sd.1	min.diff	diffmeth.p.adj.fdr	combinedRank	num.na.0	num.na.1	mean.covg.0	mean.covg.1	min.covg.0	min.covg.1	max.covg.0	max.covg.1	nsamples.covg.thres5.0	nsamples.covg.thres5.1
4860	cg17133774	chr1	6198667	+	184739 days, 16:57:00	269341 days, 10:01:00	-84602 days, 6:56:00	-366272 days, 16:33:01	1.53E-07	325585 days, 11:57:00	72628 days, 17:27:00	49210 days, 20:54:00	411873 days, 1:34:00	131529 days, 15:56:00	81819 days, 8:41:00	0	1919 days, 15:19:00	4325	0	0	23148 days, 16:33:00	15432 days, 18:22:00	4	9	23	26	71	18
6982	cg08648047	chr1	11028561	+	493605 days, 12:12:00	450473 days, 21:03:01	43131 days, 15:09:00	90277 days, 16:58:00	1.74E-06	550145 days, 23:32:00	422282 days, 20:46:00	24618 days, 21:15:00	498364 days, 17:48:01	35163 days, 1:44:00	42567 days, 23:52:00	0	4895 days, 16:36:00	93999	0	0	28935 days, 16:27:00	27006 days, 16:09:00	3	8	20	18	71	18
9791	cg02956519	chr1	19988579	+	117524 days, 0:07:00	143259 days, 0:29:00	-25736 days, 23:38:00	-188291 days, 17:16:00	1.02E-06	223139 days, 16:06:00	65285 days, 15:51:00	36400 days, 13:07:00	203010 days, 11:01:00	7981 days, 22:16:00	34495 days, 18:38:00	0	4070 days, 14:02:00	90190	0	0	40509 days, 19:13:00	15432 days, 15:22:00	7	7	27	20	72	18
14952	cg24408347	chr1	36553208	-	652117 days, 13:38:00	623610 days, 2:04:01	28507 days, 11:34:00	44300 days, 17:57:00	3.54E-06	670479 days, 8:15:00	634243 days, 0:43:01	7979 days, 23:38:00	665887 days, 1:55:00	527058 days, 11:37:00	35759 days, 12:45:00	0	6072 days, 16:05:00	213110	0	0	33758 days, 3:11:00	38580 days, 16:56:00	3	6	19	17	71	18
16086	cg00295382	chr1	40364870	+	619236 days, 3:09:01	586598 days, 0:34:01	32638 days, 2:35:00	53630 days, 4:57:00	3.63E-06	637908 days, 1:38:00	589097 days, 20:05:00	11679 days, 8:54:00	621395 days, 21:43:01	502671 days, 9:57:00	2893 days, 0:18:00	0	6102 days, 18:54:00	182093	0	0	2894 days, 3:27:00	57870 days, 23:53:00	4	6	25	32	70	18
19533	cg04858834	chr1	54231196	-	656966 days, 22:02:00	637199 days, 1:24:00	19767 days, 20:38:00	30283 days, 16:35:00	3.05E-06	671137 days, 17:29:00	64240 days, 13:27:00	569 days, 4:22:00	659860 days, 17:13:01	580905 days, 22:55:00	21500 days, 23:19:00	0	5866 days, 5:45:00	271363	0	0	58835 days, 14:02:00	30864 days, 23:44:00	8	13	27	30	72	18
20277	cg19810723	chr1	58823579	+	640754 days, 8:32:00	587003 days, 13:39:01	53750 days, 18:52:00	86796 days, 2:49:00	1.34E-06	657852 days, 15:58:00	599914 days, 14:01:00	12759 days, 14:21:00	655391 days, 6:02:00	344147 days, 15:27:01	75080 days, 23:15:00	0	4566 days, 23:05:00	100053	0	0	62693 days, 9:38:00	54012 days, 20:18:00	5	9	25	20	72	18
20629	cg08457514	chr1	61803736	-	321010 days, 8:36:00	255714 days, 23:02:00	65295 days, 9:34:00	222433 days, 4:04:00	1.86E-06	404454 days, 23:15:00	253182 days, 12:21:00	31812 days, 19:45:00	32718 days, 15:54:00	117775 days, 4:53:00	55357 days, 3:53:00	0	4907 days, 16:35:00	18850	0	0	54977 days, 8:27:00	23148 days, 13:33:00	6	4	24	15	72	17
21120	cg20301308	chr1	65534742	-	76474 days, 2:34:00	117933 days, 16:09:00	-41460 days, 10:25:00	-404223 days, 9:51:01	1.57E-06	132055 days, 6:42:00	27183 days, 13:31:00	2306 days, 2:33:00	227558 days, 4:55:00	75052 days, 2:03:00	37954 days, 20:57:00	0	4888 days, 5:59:00	39258	0	0	54977 days, 10:27:00	65586 days, 22:04:00	6	2	24	19	72	17
21261	cg23045908	chr1	66799419	-	1034 days, 2:43:00	174664 days, 11:26:00	-71254 days, 20:14:00	-499079 days, 11:15:00	1.80E-07	212917 days, 10:43:01	54741 days, 5:25:00	34148 days, 1:07:00	387338 days, 14:06:00	84718 days, 14:56:00	69207 days, 19:45:00	0	2017 days, 19:34:00	3662	0	0	1 day, 3:35:00	30864 days, 18:44:00	5	3	24	25	72	17
23771	cg08262637	chr1	93878034	-	648135 days, 3:03:01	633913 days, 23:26:00	14221 days, 3:37:00	21989 days, 5:28:00	3.75E-06	657133 days, 9:19:00	633762 days, 11:27:01	5025 days, 5:45:00	649933 days, 7:29:00	590485 days, 5:24:01	14534 days, 1:43:00	0	6102 days, 18:54:00	316332	0	0	61728 days, 22:29:00	23148 days, 16:33:00	3	6	24	24	71	18
24716	cg24535643	chr1	108029106	-	618969 days, 23:52:01	586644 days, 12:36:00	32325 days, 11:16:00	53125 days, 19:35:00	3.61E-06	645928 days, 15:51:01	551317 days, 10:37:00	16404 days, 20:36:00	619278 days, 12:19:00	495337 days, 13:26:01	32666 days, 5:43:00	0	6102 days, 18:54:00	183607	0	0	19:15:00	27006 days, 18:09:00	7	8	24	20	72	18
26880	cg25767870	chr1	118188756	+	563856 days, 20:07:01	59251 days, 3:47:00	-28655 days, 6:17:00	-49074 days, 20:22:00	3.50E-06	615538 days, 15:18:00	485570 days, 22:05:01	27785 days, 15:12:00	647660 days, 17:29:00	5522 days, 22:36:00	26146 days, 6:09:00	0	6072 days, 16:05:00	196697	0	0	50154 days, 21:42:00	3858 days, 15:36:00	6	9	23	21	72	18
27849	cg10020892	chr1	147016901	-	68980 days, 10:18:00	154645 days, 1:26:00	-85665 days, 8:52:00	-62285 days, 22:32:00	2.48E-09	153101 days, 9:18:00	36574 days, 17:48:00	23941 days, 7:46:00	419230 days, 20:38:01	60621 days, 18:02:00	80704 days, 13:55:00	0	202 days, 7:52:00	774	0	0	44367 days, 21:49:00	3858 days, 17:36:00	6	9	28	25	72	18
29153	cg02493846	chr1	151809534	+	376481 days, 0:13:01	424927 days, 9:14:00	-48447 days, 14:59:00	-119207 days, 16:19:00	3.33E-06	474012 days, 21:55:01	278051 days, 15:29:00	40789 days, 1:24:00	583334 days, 21:11:00	343567 days, 9:47:00	60746 days, 16:01:00	0	5942 days, 1:27:00	57931	0	0	63657 days, 23:47:00	46296 days, 20:07:00	5	7	26	24	72	18
32802	cg06417806	chr1	161655029	+	65121 days, 17:14:00	636183 days, 16:34:00	15033 days, 11:46:00	23149 days, 19:07:00	2.34E-06	66949 days, 22:59:00	622860 days, 8:25:00	7975 days, 7:44:00	658413 days, 11:28:00	606366 days, 13:11:01	15646 days, 23:43:00	0	5341 days, 14:12:00	309245	0	0	66551 days, 8:13:00	7716 days, 12:11:00	5	6	18	16	72	18
37081	cg26915799	chr1	201852272	-	186940 days, 0:21:00	226833 days, 6:57:00	-39894 days, 17:23:00	-187459 days, 9:57:00	5.17E-06	272821 days, 2:27:00	94396 days, 3:16:00	45118 days, 13:14:00	344661 days, 13:38:00	165504 days, 1:28:00	45736 days, 9:11:00	0	6727 days, 15:16:00	42791	0	0	1 day, 1:25:00	16.5	7	8	23	22	72	18
39024	cg12697139	chr1	209571889	+	385035 days, 15:28:00	457039 days, 22:36:01	-72005 days, 16:52:00	-168956 days, 12:36:00	5.48E-07	524165 days, 6:37:01	279722 days, 11:53:00	57734 days, 23:26:00	520926 days, 0:37:01	360890 days, 5:45:00	51333 days, 5:36:00	0	3106 days, 12:49:00	31019	0	0	51119 days, 9:51:00	42438 days, 20:31:00	7	7	22	25	72	18
39335	cg13066703	chr1	211526705	-	92853 days, 2:34:00	15602 days, 23:14:00	-63177 days, 10:14:00	-491366 days, 7:12:01	2.69E-06	259563 days, 19:46:00	55917 days, 21:38:00	28878 days, 17:38:00	390987 days, 18:33:00	78366 days, 8:46:00	70695 days, 13:43:00	0	5524 days, 16:13:00	7978	0	0	38580 days, 18:56:00	38580 days, 18:56:00	7	6	20	19	72	18
40223	cg07810039	chr1	218524558	+	471640 days, 15:38:00	530517 days, 3:03:01	-58877 days, 12:35:00	-116241 days, 15:04:00	2.39E-06	56366 days, 0:15:00	310377 days, 6:52:00	42653 days, 12:21:00	619563 days, 6:26:01	480868 days, 7:24:00	41673 days, 10:35:00	0	5378 days, 7:19:00	60665	0	0	36651 days, 17:38:00	12	6	4	22	20	72	17
41221	cg26341831	chr1	226036279	-	224275 days, 10:42:00	152507 days, 17:34:00	71767 days, 17:08:00	372320 days, 15:21:00	4.68E-07	344804 days, 7:23:00	100938 days, 1:09:00	47892 days, 20:25:00	266481 days, 20:03:00	3743 days, 4:22:00	60378 days, 16:35:00	0	2931 days, 8:55:00	4022	0	0	17:05:00	38580 days, 18:56:00	8	6	24	22	72	18
41260	cg20334115	chr1	226107899	+	486135 days, 16:26:01	563544 days, 17:57:00	-77410 days, 22:29:00	-146096 days, 13:18:00	1.78E-08	604996 days, 23:01:00	349389 days, 12:34:01	53085 days, 23:53:00	641489 days, 3:55:00	478045 days, 18:26:01	42114 days, 20:26:00	0	82 days, 22:24:00	40108	0	0	1 day, 1:25:00	38580 days, 20:56:00	8	8	29	24	72	18
41516	cg07795928	chr1	226900896	+	461513 days, 9:35:00	389561 days, 1:55:00	71952 days, 7:41:00	167068 days, 5:42:00	4.26E-06	538912 days, 20:31:00	351406 days, 21:09:00	39688 days, 13:22:00	505912 days, 15:16:01	330888 days, 4:05:01	42730 days, 0:21:00	0	6255 days, 7:47:00	31609	0	0	33758 days, 4:11:00	46296 days, 17:07:00	2	5	20	15	71	18
41635	cg16726760	chr1	227612340	+	590723 days, 9:28:00	530482 days, 3:05:00	60241 days, 6:23:00	106441 days, 20:16:00	1.47E-06	61803 days, 17:42:00	561547 days, 7:18:00	12676 days, 0:57:00	593622 days, 23:35:01	292106 days, 14:04:01	77468 days, 23:16:00	0	4826 days, 22:48:00	70970	0	0	22184 days, 5:24:00	30864 days, 18:44:00	6	9	25	21	72	18
43247	cg25141943	chr1	234743775	-	1901 days, 23:49:00	25931 days, 5:53:00	-6912 days, 16:17:00	-236451 days, 23:17:00	4.40E-06	29360 days, 23:22:00	12351 days, 4:21:00	2981 days, 14:59:00	5261 days, 17:28:00	1787 days, 12:17:00	8037 days, 9:43:00	0	6342 days, 12:13:00	264533	0	0	44367 days, 20:49:00	46296 days, 19:07:00	6	6	25	19	72	18
43440	cg13395373	chr1	235664791	-	65856 days, 13:39:00	635594 days, 3:42:00	22971 days, 12:47:00	35192 days, 17:07:00	2.74E-06	667707 days, 17:38:01	642629 days, 7:26:00	5669 days, 9:57:00	659248 days, 22:36:01	56165 days, 22:41:00	25521 days, 20:41:00	0	5589 days, 10:14:00	248890	0	0	1 day, 3:35:00	19290 days, 15:58:00	4	9	27	22	71	18
43648	cg27631057	chr1	236651140	+	599551 days, 11:03:00	545177 days, 22:06:00	54373 days, 12:57:00	94104 days, 1:41:00	1.87E-06	628548 days, 13:35:00	557221 days, 5:23:00	16031 days, 23:21:00	602652 days, 11:57:00	350934 days, 3:49:00	71001 days, 19:21:00	0	4907 days, 16:35:00	87820	0	0	22:25:00	15432 days, 14:22:00	5	6	21	19	72	18
47216	cg00587472	chr2	6952860	-	347525 days, 11:07:00	412711 days, 21:04:00	-65187 days, 14:03:00	-169129 days, 10:01:00	2.36E-06	450610 days, 14:17:01	22812 days, 3:05:00	40168 days, 20:12:00	539099 days, 16:01:00	293294 days, 7:27:00	65768 days, 12:12:00	0	5352 days, 18:16:00	30955	0	0	39545 days, 5:04:00	30864 days, 15:44:00	4	6	25	18	71	18
48519	cg12050497	chr2	14773274	-	224578 days, 22:12:01	137131 days, 11:02:00	8744 days, 17:55:00	475228 days, 7:11:01	4.05E-06	34271 days, 13:46:00	11964 days, 7:46:00	48634 days, 16:38:00	20791 days, 0:49:00	60603 days, 10:09:00	3650 days, 19:36:00	0	6102 days, 18:54:00	1269	0	0	66551 days, 11:13:00	19290 days, 14:58:00	6	3	23	22	72	17
49595	cg03813964	chr2	24709887	+	618049 days, 18:28:00	558866 days, 2:18:01	5918 days, 8:49:00	99669 days, 7:01:00	3.14E-07	636326 days, 9:51:01	589138 days, 23:13:01	11100 days, 2:43:00	625917 days, 5:05:00	294168 days, 21:37:00	78395 days, 13:43:00	0	2434 days, 22:35:00	79547	0	0	37616 days, 5:47:00	462963 days, 8:07:01	4	4	23	17	71	17
50105	cg05531689	chr2	26729139	-	486528 days, 13:14:00	436827 days, 15:33:01	49700 days, 21:41:00	106355 days, 16:36:00	3.54E-06	535877 days, 6:57:01	416969 days, 10:17:00	24028 days, 7:14:00	473060 days, 14:15:00	356310 days, 19:03:00	34040 days, 9:57:00	0	6072 days, 16:05:00	71055	0	0	61729 days, 0:29:00	3858 days, 15:36:00	8	11	26	22	72	18
51059	cg20495819	chr2	30448529	-	101826 days, 11:04:00	137588 days, 6:39:00	-35762 days, 4:25:00	-284795 days, 22:46:00	1.51E-06	172554 days, 16:17:00	60823 days, 8:27:00	22654 days, 23:12:00	33099 days, 12:23:00	94075 days, 1:38:00	58062 days, 6:27:00	0	4888 days, 5:59:00	53679	0	0	4823 days, 1:44:00	11574 days, 15:47:00	5	7	24	22	72	18
52123	cg09968461	chr2	40370829	+	638166 days, 5:58:01	604747 days, 15:04:00	33418 days, 14:54:00	53292 days, 11:12:00	5.05E-06	652911 days, 8:11:00	610695 days, 5:52:01	9733 days, 17:16:00	648399 days, 0:19:00	500480 days, 6:49:00	34801 days, 4:13:00	0	6719 days, 16:29:00	183115	0	0	58835 days, 10:02:00	50154 days, 19:42:00	5	5	26	27	72	18
53500	cg14965639	chr2	48795994	+	28293 days, 15:55:00	371514 days, 22:13:00	-88579 days, 16:57:00	-26714 days, 7:13:00	3.20E-06	44008 days, 9:21:00	121780 days, 12:02:00	6124 days, 4:12:00	618632 days, 2:54:00	207591 days, 21:25:00	99061 days, 20:13:00	0	5892 days, 16:16:00	12718	0	0	36651 days, 17:38:00	42438 days, 18:31:00	3	5	19	19	71	18
55732	cg11676189	chr2	69875470	-	22181 days, 7:06:00	42030 days, 16:28:00	-19850 days, 14:37:00	-520663 days, 1:24:00	4.50E-06	7258 days, 12:01:00	13922 days, 14:33:00	9192 days, 19:32:00	114082 days, 9:58:00	18376 days, 14:25:00	2684 days, 19:04:00	0	6380 days, 1:08:00	122921	0	0	27006 days, 16:09:00	11	6	3	20	18	72	17
56825	cg01987702	chr2	74264707	-	69073 days, 16:43:00	109981 days, 15:14:00	-40908 days, 1:29:00	-431376 days, 5:43:00	5.51E-07	107247 days, 17:17:00	43541 days, 17:05:00	14929 days, 11:11:00	20132 days, 21:01:00	56240 days, 7:33:00	46279 days, 22:45:00	0	3106 days, 12:49:00	40526	0	0	31829 days, 5:53:00	54012 days, 19:18:00	4	4	26	18	71	17
58075	cg19805943	chr2	85933069	+	431268 days, 21:24:00	49604 days, 8:04:00	-64775 days, 12:44:00	-138119 days, 22:07:00	3.54E-06	579939 days, 11:12:00	238675 days, 21:22:01	67705 days, 8:58:00	615770 days, 12:46:00	384787 days, 11:39:00	64661 days, 0:24:00	0	6072 days, 16:05:00	44414	0	0	12.5	30864 days, 14:44:00	4	5	21	15	71	18
59002	cg23009780	chr2	96774492	+	285457 days, 11:52:00	212540 days, 7:19:01	72917 days, 4:33:00	287383 days, 10:58:00	2.24E-06	342120 days, 17:59:01	231334 days, 2:32:00	28957 days, 10:42:00	314306 days, 1:27:00	28518 days, 22:41:00	70779 days, 3:42:00	0	5211 days, 23:33:00	10479	0	0	66551 days, 12:13:00	15432 days, 16:22:00	7	6	26	23	72	18
59139	cg07749613	chr2	97073539	+	36505 days, 0:02:00	65540 days, 7:58:00	-29036 days, 16:05:00	-512737 days, 17:23:00	6.96E-08	71430 days, 14:34:00	17955 days, 7:49:00	13447 days, 8:14:00	193687 days, 17:42:00	31333 days, 21:45:00	35916 days, 2:31:00	0	119 days, 10:04:00	76091	0	0	61728 days, 21:29:00	30864 days, 17:44:00	4	7	22	20	71	18
59664	cg07834510	chr2	99004292	+	620326 days, 11:12:00	59072 days, 11:16:00	29601 days, 18:31:00	4843 days, 4:01:00	1.70E-06	650532 days, 14:56:00	557847 days, 19:48:00	16900 days, 9:44:00	627145 days, 5:03:00	503692 days, 4:37:00	31147 days, 21:48:00	0	4895 days, 16:36:00	198846	0	0	10610 days, 1:38:00	42438 days, 19:31:00	6	5	20	19	72	18
60178	cg27239243	chr2	101945867	-	12293 days, 16:33:00	161309 days, 15:14:00	-38373 days, 6:17:00	-2594 days, 14:47:00	7.45E-07	217231 days, 0:13:01	57374 days, 3:07:00	31634 days, 1:46:00	282682 days, 23:04:01	94782 days, 17:05:00	50231 days, 22:45:00	0	3626 days, 21:45:00	46528	0	0	38580 days, 19:56:00	13	6	7	24	20	72	18
62758	cg18843856	chr2	121651050	-	606922 days, 10:52:00	553163 days, 16:12:00	53758 days, 18:41:00	91819 days, 19:34:00	1.82E-06	636869 days, 2:15:00	538120 days, 15:28:00	17138 days, 8:42:00	613203 days, 7:07:00	391327 days, 8:58:00	53540 days, 10:05:00	0	4907 days, 16:35:00	91429	0	0	1929 days, 13:18:00	46296 days, 18:07:00	5	7	22	18	72	18
62944	cg06866375	chr2	122757127	-	100029 days, 21:28:00	130763 days, 18:41:00	-30734 days, 2:47:00	-253021 days, 4:52:01	5.93E-07	19709 days, 5:24:00	5023 days, 7:16:00	25829 days, 22:13:00	239393 days, 20:29:00	86788 days, 12:01:00	38309 days, 15:22:00	0	3129 days, 23:49:00	69798	0	0	15432 days, 17:22:00	30864 days, 17:44:00	4	5	23	23	71	18
65222	cg20438460	chr2	146580994	+	596897 days, 11:27:01	547557 days, 16:09:00	49339 days, 19:19:00	85401 days, 8:31:00	5.37E-06	624783 days, 11:05:00	5188 days, 17:56:00	18286 days, 11:37:00	616324 days, 6:52:00	380745 days, 5:17:00	64474 days, 15:29:00	0	6899 days, 7:19:00	102597	0	0	22184 days, 4:24:00	57870 days, 19:53:00	5	6	21	18	72	18
65571	cg19350357	chr2	152118835	+	198153 days, 2:27:00	253394 days, 20:19:00	-55242 days, 6:08:00	-238947 days, 14:11:01	5.19E-06	305362 days, 17:25:01	116376 days, 1:25:00	40565 days, 6:58:00	371784 days, 12:22:00	175231 days, 8:45:00	54044 days, 3:28:00	0	6727 days, 15:16:00	16397	0	0	56906 days, 7:44:00	54012 days, 20:18:00	4	5	22	19	71	18
66212	cg04408104	chr2	160106670	+	50030 days, 7:37:00	96269 days, 5:45:00	-46239 days, 1:52:00	-595306 days, 21:23:01	1.25E-06	149555 days, 8:58:00	18076 days, 4:03:00	24054 days, 23:05:00	3023 days, 0:43:00	3139 days, 23:41:00	6273 days, 13:04:00	0	4401 days, 2:56:00	29251	0	0	68480 days, 10:31:00	61728 days, 21:29:00	6	9	22	20	72	18
67609	cg12345526	chr2	173159062	+	488923 days, 9:48:01	545033 days, 20:43:00	-56111 days, 13:05:00	-107400 days, 2:08:00	4.45E-06	595215 days, 0:17:00	378360 days, 12:22:00	49940 days, 20:09:00	612530 days, 3:33:00	4721 days, 22:35:00	39656 days, 22:01:00	0	6380 days, 1:08:00	69848	0	0	59799 days, 22:11:00	46296 days, 19:07:00	4	6	27	18	71	18
71750	cg02296171	chr2	209224657	-	562550 days, 0:52:00	59820 days, 20:17:00	-35659 days, 14:02:00	-60846 days, 6:45:00	1.02E-06	629376 days, 21:44:00	46192 days, 20:25:00	36930 days, 4:36:00	653158 days, 0:22:00	51655 days, 18:59:00	34136 days, 11:34:00	0	4070 days, 14:02:00	160506	0	0	53048 days, 7:09:00	42438 days, 18:31:00	7	6	19	20	72	18
71751	cg18559579	chr2	209224676	-	550891 days, 7:26:00	596692 days, 10:28:01	-45802 days, 20:59:00	-79056 days, 1:34:00	2.54E-06	61418 days, 0:46:00	321797 days, 17:29:00	48292 days, 10:55:00	663585 days, 5:51:00	530650 days, 11:38:01	4030 days, 17:03:00	0	5486 days, 1:04:00	115226	0	0	45332 days, 4:58:00	578704 days, 1:53:01	2	3	17	19	71	17
71854	cg04507925	chr2	210824770	-	532736 days, 19:58:00	457584 days, 10:44:00	75152 days, 9:14:00	150235 days, 15:07:00	2.23E-07	581165 days, 17:36:00	463535 days, 6:41:01	25494 days, 12:33:00	532765 days, 9:32:00	26356 days, 18:35:00	81940 days, 9:19:00	0	2142 days, 18:11:00	38238	0	0	14	57870 days, 22:53:00	8	7	23	23	72	18
72566	cg24166100	chr2	218886643	-	379364 days, 11:11:01	310959 days, 10:27:00	68405 days, 0:45:00	195253 days, 0:13:00	3.11E-06	442809 days, 20:43:00	310767 days, 23:53:00	2808 days, 4:03:00	370003 days, 22:26:01	143562 days, 10:29:00	55927 days, 11:42:00	0	5866 days, 5:45:00	23933	0	0	65586 days, 22:04:00	61728 days, 21:29:00	5	5	22	23	72	18
74853	cg09596722	chr2	232525772	+	609323 days, 23:03:00	570608 days, 3:19:00	38715 days, 19:44:00	65004 days, 12:47:00	1.26E-06	642900 days, 7:03:00	562578 days, 11:41:01	15737 days, 1:16:00	610327 days, 8:07:01	425678 days, 7:08:01	43769 days, 9:15:00	0	4401 days, 2:56:00	149190	0	0	18326 days, 4:49:00	23148 days, 17:33:00	5	9	22	21	72	18
75636	cg09453076	chr2	235406275	+	2098 days, 7:57:00	14087 days, 13:31:00	6895 days, 17:59:00	284106 days, 8:11:01	2.05E-06	61934 days, 6:04:00	10574 days, 19:07:00	9704 days, 2:47:00	25233 days, 2:57:00	8362 days, 6:29:00	3708 days, 13:16:00	0	5072 days, 2:04:00	264799	0	0	58835 days, 10:02:00	14	8	8	25	20	72	18
76435	cg15712510	chr2	238418692	-	604481 days, 23:59:00	568467 days, 5:08:00	36014 days, 18:52:00	60822 days, 13:38:00	4.96E-06	634788 days, 5:53:00	553289 days, 9:42:00	14040 days, 23:13:00	608905 days, 2:33:00	407889 days, 14:09:00	49159 days, 6:07:00	0	6719 days, 16:29:00	160568	0	0	7716 days, 14:11:00	3858 days, 12:36:00	5	4	22	19	72	17
76688	cg17079034	chr2	239047280	+	266634 days, 19:16:00	215368 days, 18:29:01	51266 days, 0:47:00	207892 days, 10:12:01	2.07E-06	337610 days, 15:22:00	212813 days, 19:37:00	2773 days, 11:07:00	292789 days, 5:54:00	79378 days, 18:33:00	49546 days, 6:43:00	0	507 days, 12:51:00	21420	0	0	68480 days, 11:31:00	14.5	6	8	25	22	72	18
77410	cg01790646	chr2	240321229	+	70725 days, 10:04:00	120810 days, 18:32:00	-50086 days, 15:32:00	-498581 days, 21:23:01	3.51E-07	164360 days, 10:25:00	46125 days, 23:27:00	19574 days, 11:37:00	270365 days, 16:38:00	54662 days, 2:18:00	61626 days, 9:49:00	0	2490 days, 12:26:00	22650	0	0	22184 days, 6:24:00	65587 days, 0:04:00	5	6	30	22	72	18
77549	cg09718582	chr2	240751196	+	359910 days, 9:54:00	292877 days, 22:42:00	67032 days, 11:12:00	202153 days, 15:39:01	2.68E-06	492277 days, 4:13:00	275185 days, 11:02:00	44532 days, 19:59:00	381136 days, 0:51:01	177919 days, 13:28:00	51373 days, 19:32:00	0	5524 days, 16:13:00	22503	0	0	5787 days, 14:53:00	50154 days, 21:42:00	5	5	24	29	72	18
83028	cg09866743	chr3	35706038	-	65179 days, 23:43:00	131837 days, 5:37:00	-66658 days, 18:06:00	-655735 days, 20:49:01	8.99E-07	149896 days, 15:58:00	29457 days, 4:58:00	23748 days, 11:06:00	361400 days, 9:26:00	66035 days, 13:59:00	73933 days, 22:45:00	0	3983 days, 16:02:00	5745	0	0	35687 days, 4:29:00	30864 days, 15:44:00	4	7	22	19	70	18
83475	cg11410859	chr3	38687164	+	609940 days, 15:52:00	563758 days, 23:26:00	46181 days, 16:27:00	77958 days, 18:04:00	3.76E-06	635102 days, 1:56:01	569796 days, 17:19:00	12883 days, 17:15:00	61839 days, 0:55:00	401849 days, 23:33:00	58647 days, 12:27:00	0	6102 days, 18:54:00	117567	0	0	63658 days, 0:47:00	11574 days, 17:47:00	5	7	24	22	72	18
89159	cg00125744	chr3	66008776	+	533420 days, 4:53:01	452887 days, 13:27:00	80532 days, 15:26:00	161685 days, 0:09:00	8.93E-07	574640 days, 23:05:00	471731 days, 1:33:01	21170 days, 7:52:00	537910 days, 9:05:00	246265 days, 11:36:00	95019 days, 17:09:00	0	3983 days, 16:02:00	33535	0	0	39545 days, 7:04:00	50154 days, 18:42:00	7	6	26	18	72	18
92023	cg08267038	chr3	113325595	-	137746 days, 13:44:00	188652 days, 10:32:00	-50906 days, 3:12:00	-302020 days, 12:51:01	4.92E-08	264425 days, 22:39:00	75203 days, 5:36:00	42093 days, 6:04:00	30863 days, 20:32:00	114651 days, 17:49:00	51267 days, 22:59:00	0	1137 days, 1:09:00	21388	0	0	55941 days, 21:36:00	57870 days, 22:53:00	4	10	22	25	71	18
93235	cg07638500	chr3	123371420	+	165564 days, 22:58:00	113047 days, 14:39:00	52517 days, 8:18:00	3637 days, 1:21:00	5.23E-08	23184 days, 19:16:00	95740 days, 18:18:00	28928 days, 4:04:00	159708 days, 17:29:00	47240 days, 21:53:00	29586 days, 12:27:00	0	1137 days, 1:09:00	18998	0	0	62693 days, 9:38:00	7716 days, 15:11:00	5	8	21	22	72	18
93254	cg23726408	chr3	123498880	+	623182 days, 4:04:00	565942 days, 10:19:01	57239 days, 17:45:00	95410 days, 17:41:00	3.35E-06	644926 days, 0:33:00	581713 days, 17:23:00	1408 days, 9:56:00	627545 days, 11:26:00	382781 days, 5:23:00	73742 days, 18:35:00	0	5942 days, 1:27:00	85789	0	0	11574 days, 15:47:00	12	6	6	24	19	72	18
93257	cg08439487	chr3	123509516	+	520121 days, 20:54:00	439190 days, 5:55:01	80931 days, 14:59:00	167017 days, 11:17:00	1.47E-09	581909 days, 1:24:00	426078 days, 9:57:00	35903 days, 14:27:00	531023 days, 13:32:00	290965 days, 12:39:00	523 days, 23:06:00	0	159 days, 10:16:00	31628	0	0	453318 days, 4:38:00	655864 days, 10:44:00	3	3	16	10	66	16
94572	cg25197194	chr3	128758787	+	457746 days, 15:02:01	513519 days, 19:21:00	-55774 days, 19:41:00	-11357 days, 22:45:00	3.91E-06	566494 days, 20:38:01	356813 days, 16:37:00	3927 days, 18:49:00	609962 days, 0:07:00	416902 days, 3:49:00	44777 days, 23:11:00	0	6102 days, 18:54:00	63254	0	0	32793 days, 20:02:00	11574 days, 17:47:00	5	8	30	29	72	18
97302	cg19483007	chr3	149327651	-	265002 days, 5:46:00	196269 days, 11:41:00	68732 days, 18:05:00	29189 days, 4:53:00	1.55E-06	330674 days, 2:52:00	185988 days, 11:27:00	30920 days, 10:37:00	277316 days, 23:53:00	80602 days, 12:48:00	57025 days, 18:47:00	0	4888 days, 5:59:00	10008	0	0	46296 days, 20:07:00	57870 days, 20:53:00	7	7	26	18	72	18
97703	cg24333845	chr3	152016806	-	62963 days, 13:25:00	97063 days, 17:17:00	-34101 days, 20:08:00	-398033 days, 4:32:01	1.96E-06	108066 days, 19:32:00	32195 days, 0:28:00	14741 days, 23:02:00	194739 days, 0:21:00	43699 days, 17:14:00	42841 days, 6:32:00	0	4982 days, 0:04:00	58513	0	0	61728 days, 21:29:00	50154 days, 19:42:00	3	3	25	20	70	17
97705	cg09219813	chr3	152017017	+	44587 days, 22:53:00	66662 days, 5:15:00	-22075 days, 17:39:00	-357193 days, 21:24:00	9.41E-07	88533 days, 23:11:00	25721 days, 23:07:00	12389 days, 16:12:00	117905 days, 8:33:00	23525 days, 15:22:00	26372 days, 18:29:00	0	3983 days, 16:02:00	109160	0	0	12:15:00	15432 days, 13:22:00	5	3	20	18	72	17
97923	cg18623216	chr3	155421970	-	442986 days, 2:57:00	521083 days, 12:48:01	-78098 days, 14:08:00	-160356 days, 10:49:00	9.65E-07	557440 days, 3:39:00	268385 days, 19:44:00	67203 days, 5:31:00	635743 days, 8:46:00	42878 days, 3:56:00	47085 days, 3:17:00	0	4033 days, 21:51:00	33996	0	0	30864 days, 16:44:00	38580 days, 17:56:00	5	7	23	23	72	18
99388	cg04002794	chr3	171805805	-	57961 days, 20:38:00	90800 days, 5:49:00	-3284 days, 3:53:00	-410181 days, 16:16:00	3.07E-06	87920 days, 18:38:00	30272 days, 21:12:00	1134 days, 16:39:00	209688 days, 6:14:00	49554 days, 21:45:00	46096 days, 19:35:00	0	5866 days, 5:45:00	62495	0	0	7716 days, 16:11:00	11574 days, 16:47:00	7	11	26	22	72	18
109062	cg04811945	chr4	15779709	-	111925 days, 9:26:00	132901 days, 5:39:00	-20976 days, 3:47:00	-162815 days, 9:59:00	4.00E-06	16047 days, 6:56:00	56140 days, 18:55:00	23426 days, 1:01:00	227212 days, 11:32:00	77901 days, 0:05:00	39512 days, 14:21:00	0	6102 days, 18:54:00	115735	0	0	48226 days, 0:24:00	19290 days, 21:58:00	6	13	28	27	72	18
111173	cg05747376	chr4	44728857	+	41865 days, 1:59:00	65852 days, 12:12:00	-23988 days, 13:47:00	-40050 days, 7:52:00	2.23E-06	5976 days, 2:37:00	2626 days, 22:18:00	7843 days, 10:41:00	186450 days, 6:15:00	3871 days, 7:07:00	35259 days, 4:25:00	0	5211 days, 23:33:00	98725	0	0	47261 days, 7:16:00	57870 days, 20:53:00	5	4	23	20	72	17
113122	cg07445838	chr4	74962195	+	654114 days, 19:41:00	635455 days, 17:32:00	18659 days, 2:09:00	28685 days, 15:31:00	1.62E-06	663842 days, 5:42:00	638675 days, 12:05:00	5104 days, 21:43:00	661306 days, 3:25:00	558625 days, 15:31:00	28299 days, 14:36:00	0	4895 days, 16:36:00	279224	0	0	42438 days, 18:31:00	15432 days, 13:22:00	4	4	20	18	71	17
113158	cg10057264	chr4	75174204	-	199439 days, 14:31:00	240594 days, 12:41:01	-4116 days, 12:11:00	-182170 days, 9:49:00	4.52E-07	28659 days, 0:15:00	101172 days, 5:04:00	43889 days, 13:13:00	332305 days, 5:24:00	152394 days, 12:42:00	45616 days, 3:01:00	0	2927 days, 0:45:00	39966	0	0	63657 days, 19:47:00	7716 days, 12:11:00	3	4	19	20	70	17
113561	cg21542842	chr4	77899442	+	182031 days, 7:15:00	213621 days, 12:18:00	-31591 days, 18:57:00	-154868 days, 14:31:00	3.39E-06	247005 days, 17:42:01	143972 days, 4:55:00	19444 days, 11:43:00	328242 days, 22:43:01	167244 days, 16:52:00	37409 days, 1:48:00	0	5977 days, 8:36:00	66811	0	0	47261 days, 8:16:00	54012 days, 19:18:00	4	4	23	19	71	17
113640	cg24877510	chr4	78742376	+	73260 days, 16:53:00	108751 days, 23:52:00	-3550 days, 20:54:00	-367068 days, 3:19:00	1.21E-06	132600 days, 18:55:00	43102 days, 9:12:00	13345 days, 6:49:00	206795 days, 2:16:01	46650 days, 6:01:00	46243 days, 10:43:00	0	4365 days, 10:42:00	54438	0	0	16397 days, 4:31:00	19290 days, 15:58:00	7	5	26	23	72	18
113817	cg21699506	chr4	80786707	+	567835 days, 23:07:01	501512 days, 12:05:00	66323 days, 11:01:00	122836 days, 23:41:00	4.69E-06	61650 days, 21:52:00	528205 days, 10:31:00	17478 days, 17:57:00	576849 days, 16:23:00	288913 days, 6:08:00	84206 days, 5:15:00	0	6503 days, 16:07:00	54860	0	0	1 day, 3:35:00	46296 days, 20:07:00	5	5	23	26	72	18
115710	cg03648631	chr4	103749307	-	100104 days, 11:26:00	9273 days, 7:51:00	7371 days, 4:56:00	71477 days, 7:51:00	4.67E-06	166163 days, 14:06:00	62317 days, 18:32:00	20559 days, 18:32:00	131394 days, 10:13:00	68523 days, 23:19:00	16283 days, 1:31:00	0	6501 days, 6:47:00	257190	0	0	12	46296 days, 20:07:00	3	9	20	19	70	18
122465	cg06498520	chr4	186990006	-	18159 days, 10:18:00	249622 days, 19:26:01	-68029 days, 11:34:00	-308664 days, 1:13:00	5.21E-06	353311 days, 17:32:00	9980 days, 5:42:00	51006 days, 6:36:00	424801 days, 23:21:01	125497 days, 18:15:00	68543 days, 16:31:00	0	6727 days, 15:16:00	8393	0	0	36651 days, 20:38:00	65587 days, 2:04:00	6	11	27	28	72	18
126327	cg12970171	chr5	6766613	+	413475 days, 8:45:01	453276 days, 11:29:00	-39802 days, 21:16:00	-90623 days, 19:52:00	1.38E-06	52513 days, 11:42:00	311128 days, 0:33:00	41822 days, 21:19:00	523856 days, 10:45:00	373836 days, 14:37:00	42469 days, 13:47:00	0	4633 days, 5:17:00	93452	0	0	7716 days, 14:11:00	3858 days, 14:36:00	3	7	23	26	71	18
134289	cg02750941	chr5	104090236	+	608933 days, 9:06:01	560002 days, 10:49:00	48930 days, 22:17:00	82937 days, 21:35:00	2.19E-06	639912 days, 2:21:01	546964 days, 8:36:00	19638 days, 5:59:00	609988 days, 14:44:01	442132 days, 13:27:00	43614 days, 2:54:00	0	5211 days, 23:33:00	107334	0	0	24113 days, 5:42:00	23148 days, 18:33:00	7	7	22	20	72	18
134538	cg11936556	chr5	109604821	+	559817 days, 18:17:00	505521 days, 5:45:01	54296 days, 12:32:00	100894 days, 13:15:00	1.08E-06	604270 days, 0:44:00	468958 days, 18:07:00	21508 days, 22:24:00	554810 days, 7:56:01	339291 days, 10:06:00	60243 days, 6:02:00	0	4210 days, 18:58:00	77931	0	0	57870 days, 22:53:00	30864 days, 18:44:00	8	7	25	21	72	18
135178	cg26233209	chr5	115178764	+	263613 days, 9:38:00	298060 days, 21:42:00	-34448 days, 11:55:00	-120068 days, 7:34:00	2.77E-07	334422 days, 7:48:00	206837 days, 13:56:00	27285 days, 17:33:00	416069 days, 9:22:00	23943 days, 13:16:00	41176 days, 20:23:00	0	2313 days, 15:31:00	57510	0	0	56906 days, 9:44:00	42438 days, 19:31:00	6	5	26	21	72	18
136270	cg15188268	chr5	128795183	-	591183 days, 22:47:00	547142 days, 1:22:01	44041 days, 21:25:00	76627 days, 18:24:00	1.92E-06	619648 days, 5:03:00	543786 days, 18:03:01	18029 days, 3:54:00	594388 days, 12:55:00	407924 days, 7:15:01	48045 days, 11:12:00	0	4969 days, 20:07:00	120600	0	0	37616 days, 6:47:00	14	3	6	26	20	69	18
137148	cg00520708	chr5	134181266	-	186769 days, 2:38:00	242856 days, 12:13:01	-56088 days, 14:25:00	-254760 days, 5:19:00	5.06E-06	310564 days, 15:55:01	112446 days, 3:58:00	39867 days, 22:31:00	588831 days, 3:48:01	148241 days, 1:22:00	91958 days, 12:39:00	0	6719 days, 16:29:00	14408	0	0	29900 days, 7:36:00	57870 days, 23:53:00	7	10	25	20	72	18
138430	cg11061655	chr5	139422996	-	44962 days, 12:12:00	5863 days, 15:58:00	-13675 days, 20:32:00	-234273 days, 14:29:00	2.22E-06	79106 days, 1:22:00	28293 days, 15:04:00	11211 days, 8:29:00	80393 days, 23:14:00	40401 days, 1:25:00	1306 days, 19:27:00	0	5211 days, 23:33:00	174408	0	0	45332 days, 5:58:00	19290 days, 13:58:00	3	7	23	15	71	18
140606	cg06676778	chr5	148209341	-	533545 days, 10:39:01	433395 days, 6:21:00	100150 days, 4:18:00	205312 days, 23:17:00	3.31E-06	585328 days, 23:49:01	434025 days, 15:44:01	35505 days, 9:27:00	551743 days, 22:47:00	239022 days, 13:52:01	94261 days, 7:22:00	0	5942 days, 1:27:00	21875	0	0	4823 days, 2:44:00	27006 days, 19:09:00	5	9	23	26	72	18
141938	cg08445740	chr5	156594400	-	542335 days, 18:22:00	462012 days, 11:38:01	80323 days, 6:44:00	158393 days, 16:07:00	4.49E-06	60367 days, 22:53:00	474833 days, 4:41:00	30608 days, 19:03:00	578466 days, 22:04:00	275963 days, 2:04:01	90557 days, 16:05:00	0	6380 days, 1:08:00	34784	0	0	9645 days, 18:29:00	11574 days, 17:47:00	5	9	28	28	72	18
141946	cg08972954	chr5	156680241	-	28654 days, 15:06:00	46453 days, 16:13:00	-17800 days, 22:53:00	-406215 days, 5:34:00	2.01E-07	43332 days, 19:12:00	20727 days, 0:13:00	4679 days, 23:24:00	126763 days, 11:22:00	26397 days, 9:14:00	22989 days, 8:36:00	0	202 days, 15:21:00	137646	0	0	28935 days, 16:27:00	57870 days, 20:53:00	4	8	20	18	70	18
144870	cg24095374	chr5	176799366	-	112717 days, 16:23:00	162530 days, 10:32:00	-49813 days, 5:51:00	-348684 days, 1:33:01	5.90E-07	171375 days, 5:13:00	51199 days, 8:41:00	24890 days, 15:18:00	291996 days, 22:51:00	102771 days, 4:37:00	46071 days, 11:04:00	0	3129 days, 23:49:00	23067	0	0	27971 days, 7:18:00	38580 days, 19:56:00	7	7	28	23	72	18
145223	cg17796323	chr5	177547973	-	199381 days, 18:31:00	288440 days, 18:28:00	-89059 days, 0:03:00	-359494 days, 14:51:00	2.50E-08	302021 days, 13:13:00	128091 days, 8:17:00	40347 days, 22:19:00	5584 days, 1:35:00	207212 days, 20:35:01	85244 days, 22:37:00	0	906 days, 21:11:00	4668	0	0	27971 days, 5:18:00	15	7	8	22	21	72	18
150925	cg13258453	chr6	25180502	-	548692 days, 17:53:00	589959 days, 1:01:00	-41267 days, 16:52:00	-71774 days, 0:43:00	2.61E-07	609713 days, 21:14:00	437491 days, 6:33:01	36750 days, 2:53:00	62954 days, 16:26:00	557638 days, 16:33:01	24821 days, 15:29:00	0	2296 days, 8:18:00	131790	0	0	24113 days, 2:42:00	30864 days, 15:44:00	4	5	20	18	71	18
151574	cg07217851	chr6	26533467	+	21099 days, 19:34:00	31044 days, 8:12:00	-9945 days, 11:22:00	-304076 days, 21:57:00	2.67E-06	30515 days, 8:03:00	14873 days, 21:32:00	295 days, 2:44:00	69148 days, 0:13:00	21011 days, 9:48:00	13497 days, 4:42:00	0	5524 days, 16:13:00	219129	0	0	9645 days, 15:29:00	19290 days, 16:58:00	4	7	23	19	71	18
152701	cg07031070	chr6	28543670	-	595414 days, 13:02:00	558266 days, 0:05:00	37148 days, 12:58:00	63774 days, 14:12:00	9.65E-08	629145 days, 18:59:00	53521 days, 10:49:00	18968 days, 23:25:00	603671 days, 6:31:00	434915 days, 14:09:00	38363 days, 14:08:00	0	1497 days, 19:13:00	152357	0	0	29900 days, 4:36:00	23148 days, 15:33:00	6	4	24	17	72	17
154306	cg08747369	chr6	29766061	+	637366 days, 13:01:00	582688 days, 16:29:00	54677 days, 20:32:00	88846 days, 22:45:00	4.10E-06	660785 days, 0:43:01	606570 days, 2:33:00	1033 days, 14:17:00	645817 days, 22:16:00	284873 days, 6:55:01	92571 days, 14:21:00	0	6102 days, 18:54:00	96465	0	0	45332 days, 8:58:00	30864 days, 17:44:00	8	2	24	21	72	17
157122	cg11934771	chr6	31021796	-	200007 days, 8:35:01	266060 days, 11:28:01	-66054 days, 21:07:00	-277523 days, 16:06:00	6.67E-08	289732 days, 1:54:00	110445 days, 2:07:00	38163 days, 13:09:00	461516 days, 17:38:01	196217 days, 21:39:00	57673 days, 21:25:00	0	119 days, 10:04:00	11496	0	0	32793 days, 20:02:00	7716 days, 14:11:00	7	6	26	19	72	18
157149	cg21460625	chr6	31039043	+	526761 days, 20:06:00	467639 days, 5:33:00	59122 days, 14:32:00	117627 days, 10:35:00	8.02E-08	580111 days, 2:46:00	475235 days, 17:02:00	24630 days, 8:14:00	513548 days, 3:07:00	296955 days, 17:53:00	54110 days, 21:32:00	0	1306 days, 18:55:00	59369	0	0	13.5	13	6	7	23	21	72	18
160211	cg04389484	chr6	32037916	-	660155 days, 19:01:00	649953 days, 23:09:00	10201 days, 19:53:00	15439 days, 18:43:00	3.27E-06	670563 days, 17:37:00	637674 days, 22:09:00	5864 days, 9:56:00	663142 days, 22:58:00	619391 days, 16:45:01	12080 days, 10:31:00	0	5942 days, 1:27:00	361601	0	0	61728 days, 20:29:00	54012 days, 20:18:00	6	8	20	18	72	18
163161	cg14105835	chr6	33205458	+	656671 days, 17:38:01	636191 days, 0:57:01	20480 days, 16:41:00	31407 days, 4:49:00	1.60E-06	665978 days, 19:08:01	634595 days, 17:24:01	5938 days, 6:28:00	658761 days, 15:03:01	54552 days, 5:18:00	2809 days, 16:25:00	0	4895 days, 16:36:00	265986	0	0	46296 days, 21:07:00	50154 days, 21:42:00	5	11	24	22	72	18
165289	cg03573179	chr6	36165382	-	48125 days, 3:32:00	70643 days, 18:57:00	-22519 days, 8:34:00	-343460 days, 6:52:00	1.88E-06	78091 days, 14:09:00	29465 days, 12:51:00	10734 days, 6:53:00	219834 days, 12:03:01	40746 days, 16:38:00	39338 days, 19:55:00	0	4907 days, 16:35:00	106635	0	0	59800 days, 0:11:00	38580 days, 21:56:00	7	9	30	25	72	18
165697	cg19115490	chr6	37483925	-	14957 days, 4:39:00	197322 days, 5:47:00	-47751 days, 16:43:00	-266765 days, 22:16:00	1.01E-07	204990 days, 17:56:01	102359 days, 17:21:00	19832 days, 3:08:00	317587 days, 19:56:00	134821 days, 7:44:00	45708 days, 9:43:00	0	1504 days, 0:41:00	26482	0	0	37616 days, 8:47:00	19290 days, 16:58:00	6	5	24	25	72	18
166386	cg25953930	chr6	41462541	+	334409 days, 5:46:00	276027 days, 17:31:00	58381 days, 12:14:00	187921 days, 14:49:00	4.58E-06	444146 days, 15:33:01	260168 days, 16:34:00	33752 days, 5:54:00	369399 days, 9:49:00	178669 days, 1:13:00	46952 days, 4:39:00	0	6430 days, 7:27:00	25643	0	0	15432 days, 18:22:00	38580 days, 20:56:00	8	7	29	22	72	18
166748	cg09804858	chr6	42397121	+	86237 days, 14:21:00	126177 days, 7:26:00	-39940 days, 6:56:00	-357377 days, 6:32:00	1.62E-06	142928 days, 19:24:00	56215 days, 15:05:00	16920 days, 1:36:00	202128 days, 2:36:00	65858 days, 20:18:00	42168 days, 18:26:00	0	4895 days, 16:36:00	42678	0	0	20255 days, 5:07:00	61729 days, 0:29:00	6	10	23	22	72	18
168558	cg08249934	chr6	52878460	-	654484 days, 22:56:01	640648 days, 11:22:00	13836 days, 11:35:00	21180 days, 12:46:00	2.26E-06	666378 days, 15:43:01	640482 days, 16:58:00	5771 days, 22:06:00	652476 days, 15:12:01	622915 days, 16:25:01	8525 days, 12:54:00	0	5211 days, 23:33:00	321509	0	0	10610 days, 3:38:00	38580 days, 19:56:00	4	8	24	21	70	18
169926	cg20068209	chr6	75988568	-	35088 days, 1:34:00	426921 days, 5:51:00	-7605 days, 22:35:00	-193052 days, 16:04:00	4.16E-06	504267 days, 10:16:00	217858 days, 23:11:01	55386 days, 9:59:00	562206 days, 1:41:00	298132 days, 1:47:00	73129 days, 16:56:00	0	6161 days, 23:13:00	24399	0	0	16397 days, 4:31:00	19290 days, 16:58:00	5	6	25	22	72	18
170127	cg17715419	chr6	80023191	-	5434 days, 11:16:00	568352 days, 20:53:00	-24906 days, 1:47:00	-44341 days, 20:03:00	6.26E-07	601849 days, 18:18:00	467555 days, 10:17:00	27632 days, 15:37:00	611538 days, 4:35:00	525630 days, 22:36:01	22559 days, 23:55:00	0	3240 days, 21:15:00	212985	0	0	965 days, 1:09:00	46296 days, 19:07:00	5	5	23	21	72	18
170231	cg12044693	chr6	80873769	+	92980 days, 20:08:00	156550 days, 5:16:00	-63570 days, 14:52:00	-493280 days, 21:52:00	3.17E-06	182326 days, 5:08:00	40267 days, 8:08:00	33775 days, 17:54:00	32149 days, 22:47:00	66516 days, 20:14:00	60558 days, 19:27:00	0	5872 days, 4:08:00	7680	0	0	21219 days, 16:16:00	57870 days, 20:53:00	4	9	23	22	71	18
174720	cg18334681	chr6	132066129	+	157815 days, 0:28:00	206266 days, 3:56:00	-48452 days, 20:31:00	-258277 days, 16:32:00	1.72E-06	27137 days, 15:57:00	64214 days, 22:42:00	45234 days, 20:11:00	323335 days, 9:22:00	131832 days, 7:54:00	57372 days, 7:18:00	0	4895 days, 16:36:00	25311	0	0	38580 days, 17:56:00	61728 days, 22:29:00	3	5	21	24	71	18
177686	cg02071988	chr6	155448588	-	532004 days, 1:58:00	451529 days, 5:54:00	80474 days, 20:03:00	162019 days, 19:43:00	1.12E-06	57702 days, 12:19:00	419495 days, 20:56:01	28235 days, 10:46:00	566206 days, 23:02:00	309705 days, 14:32:00	82631 days, 21:45:00	0	4234 days, 18:42:00	33415	0	0	12539 days, 1:56:00	38580 days, 17:56:00	5	5	23	17	72	18
184280	cg12583572	chr7	1967976	+	548522 days, 15:31:00	486794 days, 16:25:01	61727 days, 23:06:00	118022 days, 12:58:00	1.57E-06	596063 days, 15:53:00	46471 days, 21:22:00	28032 days, 12:06:00	577055 days, 8:58:01	362574 days, 5:02:00	64252 days, 12:24:00	0	4888 days, 5:59:00	58994	0	0	32793 days, 17:02:00	3858 days, 12:36:00	5	3	19	17	72	17
185177	cg09817283	chr7	2653702	+	5419 days, 16:43:00	455730 days, 10:15:01	86239 days, 5:26:00	171237 days, 6:06:00	3.72E-06	596652 days, 10:17:00	433404 days, 19:27:00	31004 days, 4:31:00	556615 days, 15:04:00	271120 days, 0:32:00	80847 days, 2:43:00	0	6102 days, 18:54:00	30272	0	0	28935 days, 16:27:00	13	5	9	20	19	72	18
185872	cg04160501	chr7	4723667	+	59735 days, 15:33:00	111966 days, 16:56:00	-52232 days, 22:37:00	-579553 days, 5:35:01	1.42E-07	118222 days, 9:35:00	34769 days, 5:52:00	17708 days, 1:33:00	255056 days, 7:15:00	54368 days, 17:12:00	51999 days, 8:46:00	0	1919 days, 15:19:00	19418	0	0	20255 days, 4:07:00	42438 days, 17:31:00	5	6	23	16	72	18
185873	cg22218709	chr7	4723740	+	50142 days, 21:22:00	92580 days, 18:05:00	-42438 days, 3:16:00	-556869 days, 3:42:00	2.32E-08	77633 days, 22:36:00	26674 days, 16:29:00	14295 days, 0:44:00	213727 days, 15:57:00	58086 days, 7:59:00	43849 days, 19:16:00	0	906 days, 21:11:00	37053	0	0	30864 days, 17:44:00	30864 days, 18:44:00	3	9	28	21	71	18
185874	cg22846826	chr7	4723927	+	5480 days, 12:06:00	94216 days, 5:21:00	-39412 days, 19:39:00	-494549 days, 18:57:00	3.99E-08	77589 days, 1:13:00	33642 days, 6:03:00	9609 days, 15:02:00	193641 days, 5:27:00	51935 days, 13:04:00	44758 days, 7:19:00	0	1083 days, 18:07:00	43964	0	0	11574 days, 15:47:00	3858 days, 17:36:00	4	10	24	23	71	18
189851	cg23597162	chr7	28102341	-	442722 days, 11:17:01	502596 days, 23:11:01	-59875 days, 12:06:00	-125238 days, 0:59:00	5.13E-06	570916 days, 4:16:00	284466 days, 9:21:00	54338 days, 4:29:00	618506 days, 20:29:00	40292 days, 9:35:00	56159 days, 9:21:00	0	6727 days, 15:16:00	52932	0	0	965 days, 1:09:00	11574 days, 14:47:00	6	5	23	22	72	18
191460	cg11752100	chr7	39446909	+	241559 days, 18:59:00	301147 days, 18:19:00	-5959 days, 4:52:00	-215342 days, 12:09:00	1.81E-06	341990 days, 16:53:00	132948 days, 4:17:00	4030 days, 6:08:00	515766 days, 4:25:01	212287 days, 5:29:00	66274 days, 6:21:00	0	4907 days, 16:35:00	20043	0	0	42438 days, 21:31:00	14	6	5	28	23	72	18
195651	cg19453938	chr7	73265946	-	106223 days, 2:58:00	136242 days, 11:31:00	-30020 days, 15:27:00	-235722 days, 8:09:01	1.20E-06	186442 days, 12:26:00	56922 days, 1:53:00	26673 days, 11:39:00	224940 days, 19:13:00	85607 days, 6:21:00	40423 days, 21:27:00	0	4365 days, 10:42:00	72337	0	0	16397 days, 4:31:00	30864 days, 17:44:00	6	6	25	21	72	18
195835	cg07645228	chr7	73867009	-	72639 days, 11:26:00	108316 days, 15:44:00	-35678 days, 19:42:00	-371082 days, 21:14:00	3.43E-06	103260 days, 2:03:00	45393 days, 6:12:00	12514 days, 9:31:00	211875 days, 19:44:00	60692 days, 6:58:00	42851 days, 16:39:00	0	600 days, 13:51:00	53904	0	0	20255 days, 6:07:00	50154 days, 23:42:00	6	12	26	22	72	18
196485	cg15154628	chr7	76871793	+	550751 days, 14:45:00	477994 days, 19:31:00	72756 days, 19:13:00	140052 days, 2:25:00	1.54E-06	604608 days, 17:39:00	487133 days, 22:38:00	26400 days, 8:41:00	578136 days, 19:18:00	27855 days, 14:15:00	81438 days, 11:19:00	0	4888 days, 5:59:00	43256	0	0	7716 days, 13:11:00	462963 days, 8:07:01	3	4	25	15	71	17
197689	cg19103429	chr7	92460784	-	161388 days, 21:08:00	245013 days, 0:25:00	-83625 days, 20:43:00	-404070 days, 23:52:01	1.97E-06	251060 days, 7:32:00	53858 days, 9:23:00	51850 days, 0:26:00	502940 days, 12:31:00	144268 days, 18:12:00	81461 days, 13:46:00	0	4982 days, 0:04:00	2860	0	0	51119 days, 8:51:00	38580 days, 19:56:00	5	6	23	25	72	18
197901	cg07539248	chr7	93919388	+	627584 days, 7:02:00	5402 days, 0:14:00	87383 days, 7:43:00	148445 days, 6:31:00	2.51E-06	653732 days, 2:21:01	577272 days, 15:59:00	14884 days, 16:32:00	634527 days, 18:08:00	263426 days, 8:24:00	113270 days, 23:27:00	0	5486 days, 1:04:00	38998	0	0	54012 days, 22:18:00	61729 days, 0:29:00	6	9	26	22	72	18
204428	cg09414827	chr7	134832671	+	31127 days, 10:33:00	52206 days, 2:27:00	-21079 days, 8:05:00	-441435 days, 14:15:00	1.88E-06	63040 days, 23:26:00	17941 days, 22:53:00	7916 days, 10:17:00	119751 days, 14:19:00	26705 days, 23:39:00	27062 days, 15:02:00	0	4907 days, 16:35:00	115112	0	0	22184 days, 4:24:00	3858 days, 13:36:00	6	9	28	18	72	18
206078	cg03252313	chr7	148117075	+	46223 days, 6:06:00	78710 days, 16:15:00	-32488 days, 13:51:00	-477771 days, 12:24:00	3.90E-06	93999 days, 18:09:00	33690 days, 4:17:00	9687 days, 1:37:00	305932 days, 12:27:01	37003 days, 17:02:00	61698 days, 15:11:00	0	6102 days, 18:54:00	63683	0	0	3858 days, 17:36:00	54013 days, 0:18:00	4	10	29	25	71	18
216440	cg16292768	chr8	27467783	-	584974 days, 2:29:00	615953 days, 23:39:00	-3098 days, 0:17:00	-51110 days, 2:09:00	4.60E-06	652719 days, 20:09:00	488510 days, 12:43:00	36220 days, 9:25:00	646815 days, 4:36:01	57655 days, 7:26:00	21344 days, 11:12:00	0	6430 days, 7:27:00	189873	0	0	38580 days, 17:56:00	15432 days, 17:22:00	5	10	21	21	72	18
216774	cg06238667	chr8	29086832	+	570702 days, 19:29:00	501220 days, 3:14:00	69482 days, 16:15:00	128397 days, 21:13:00	4.24E-06	616898 days, 1:25:01	500499 days, 12:54:01	21948 days, 2:38:00	599106 days, 9:17:00	257301 days, 12:17:00	8922 days, 23:25:00	0	6255 days, 7:47:00	50582	0	0	2894 days, 3:27:00	23148 days, 16:33:00	3	6	29	21	71	18
216935	cg16536330	chr8	29957344	+	93411 days, 12:34:00	118823 days, 15:15:00	-2542 days, 18:56:00	-22614 days, 3:41:00	1.34E-06	145907 days, 23:23:00	51143 days, 7:53:00	19240 days, 2:02:00	22056 days, 12:46:00	67252 days, 5:52:00	33046 days, 11:14:00	0	4566 days, 23:05:00	91666	0	0	18326 days, 2:49:00	65586 days, 22:04:00	6	7	19	22	72	18
218582	cg27051318	chr8	42623771	+	69222 days, 8:05:00	115743 days, 23:03:00	-46522 days, 9:02:00	-477615 days, 8:48:01	3.72E-06	139929 days, 2:47:00	39159 days, 0:29:00	20360 days, 4:46:00	204542 days, 12:28:00	57211 days, 2:31:00	4596 days, 17:17:00	0	6102 days, 18:54:00	28705	0	0	3858 days, 14:36:00	46296 days, 19:07:00	5	9	24	19	72	18
223591	cg16103712	chr8	99023869	+	400834 days, 12:11:00	473635 days, 16:24:00	-72802 days, 19:47:00	-164577 days, 19:57:00	2.81E-06	532739 days, 0:44:00	258921 days, 4:31:01	6993 days, 7:07:00	573997 days, 19:13:00	338347 days, 22:42:00	52716 days, 5:42:00	0	5692 days, 5:52:00	32471	0	0	37616 days, 7:47:00	30864 days, 18:44:00	6	9	25	21	72	18
224333	cg11313780	chr8	103817950	-	521786 days, 23:25:01	556136 days, 11:02:00	-34350 days, 12:23:00	-63061 days, 11:17:00	2.24E-06	586988 days, 1:53:01	466014 days, 19:13:00	25554 days, 3:58:00	652163 days, 23:27:01	513347 days, 5:43:00	37689 days, 9:38:00	0	5211 days, 23:33:00	154344	0	0	3858 days, 12:36:00	42438 days, 17:31:00	4	8	23	14	71	18
226933	cg20100745	chr8	134307728	+	201739 days, 20:39:00	294833 days, 11:03:00	-93094 days, 9:35:00	-369560 days, 21:56:00	3.98E-06	418749 days, 4:17:00	99639 days, 0:01:00	59324 days, 8:57:00	560062 days, 21:37:01	129046 days, 20:51:00	90377 days, 11:55:00	0	6102 days, 18:54:00	4155	0	0	14	3858 days, 13:36:00	6	6	20	18	72	18
227022	cg15690598	chr8	134806615	-	519854 days, 9:44:01	46748 days, 7:53:00	52371 days, 2:54:00	104905 days, 11:02:00	1.74E-06	57480 days, 20:06:00	444974 days, 19:19:01	27313 days, 7:03:00	532477 days, 4:53:01	341371 days, 13:14:00	47079 days, 20:55:00	0	4895 days, 16:36:00	72816	0	0	19290 days, 14:58:00	65586 days, 22:04:00	5	3	19	19	72	17
228251	cg15630458	chr8	142986649	-	421497 days, 14:51:00	329289 days, 18:21:00	9220 days, 18:51:00	242801 days, 2:52:00	5.03E-06	515806 days, 22:42:00	340530 days, 23:01:00	42546 days, 9:15:00	448674 days, 0:31:00	62477 days, 20:18:00	100269 days, 14:32:00	0	6719 days, 16:29:00	15853	0	0	50154 days, 19:42:00	7716 days, 14:11:00	5	8	24	20	72	18
228252	cg26542567	chr8	142986670	-	578533 days, 17:42:00	517294 days, 9:53:00	61239 days, 7:49:00	11068 days, 19:52:00	5.60E-07	635762 days, 8:44:01	504352 days, 1:28:00	27380 days, 22:08:00	589891 days, 16:26:00	360973 days, 2:59:01	6009 days, 16:51:00	0	3106 days, 12:49:00	66244	0	0	55941 days, 20:36:00	61728 days, 20:29:00	4	8	26	19	71	18
228408	cg21926626	chr8	143382226	+	567469 days, 7:16:00	606134 days, 18:07:00	-38666 days, 13:09:00	-6527 days, 9:22:00	5.05E-06	645716 days, 18:16:00	459274 days, 3:44:01	39703 days, 10:34:00	650646 days, 17:09:00	515342 days, 6:24:00	38361 days, 10:27:00	0	6719 days, 16:29:00	148474	0	0	51119 days, 7:51:00	15432 days, 16:22:00	6	9	22	25	72	18
231203	cg24471894	chr9	2838508	-	288136 days, 0:25:00	343030 days, 21:24:00	-54895 days, 3:01:00	-170934 days, 1:44:00	3.79E-06	419388 days, 22:28:00	181138 days, 17:09:00	45490 days, 12:57:00	463422 days, 23:27:00	272616 days, 9:52:00	54686 days, 23:45:00	0	6102 days, 18:54:00	30368	0	0	14:25:00	61729 days, 0:29:00	6	7	25	22	72	18
232444	cg10822116	chr9	35733370	-	79486 days, 16:34:00	11384 days, 14:17:00	-34360 days, 17:44:00	-335336 days, 18:15:00	2.27E-06	146836 days, 23:42:00	56595 days, 14:27:00	15443 days, 12:47:00	210095 days, 6:15:01	75568 days, 17:11:00	40728 days, 21:08:00	0	5211 days, 23:33:00	57765	0	0	27971 days, 6:18:00	30864 days, 17:44:00	7	6	25	20	72	18
235838	cg13469953	chr9	117271936	+	660339 days, 21:42:00	643133 days, 9:58:00	17206 days, 11:44:00	26173 days, 0:26:00	4.05E-06	669387 days, 16:36:01	642253 days, 23:44:01	5874 days, 19:34:00	661383 days, 20:09:00	602651 days, 1:45:01	155 days, 20:02:00	0	6102 days, 18:54:00	292339	0	0	4823 days, 0:44:00	61728 days, 22:29:00	4	4	20	22	71	17
236180	cg13622265	chr9	124584474	-	439094 days, 2:43:00	351891 days, 2:13:00	8720 days, 7:15:00	217948 days, 8:55:00	2.47E-07	531809 days, 8:45:00	369951 days, 4:13:00	3589 days, 19:56:00	445954 days, 1:57:01	151310 days, 23:54:00	77830 days, 15:25:00	0	2237 days, 9:28:00	19593	0	0	22184 days, 2:24:00	11	3	5	19	22	71	18
236876	cg14654171	chr9	130151001	-	3608 days, 14:01:00	5794 days, 10:05:00	-2186 days, 3:56:00	-411538 days, 17:31:01	3.34E-06	5153 days, 12:19:00	20467 days, 4:14:00	6504 days, 12:06:00	139649 days, 21:45:00	25469 days, 19:34:00	29370 days, 3:12:00	0	5942 days, 1:27:00	110399	0	0	41474 days, 5:22:00	27006 days, 15:09:00	6	5	19	23	72	18
243657	cg19958736	chr10	12999550	-	646984 days, 6:48:01	614143 days, 5:28:00	3284 days, 2:32:00	51622 days, 13:12:00	3.67E-06	665755 days, 1:05:01	610078 days, 15:48:01	9880 days, 1:48:00	648338 days, 11:41:01	490068 days, 17:08:00	38741 days, 15:38:00	0	6102 days, 18:54:00	188292	0	0	22184 days, 1:24:00	385802 days, 20:16:00	2	4	16	15	71	16
244483	cg18959207	chr10	18549686	+	206430 days, 8:34:00	146585 days, 2:22:00	59845 days, 6:12:00	329773 days, 6:35:00	1.73E-06	293180 days, 7:23:00	14127 days, 22:38:00	31446 days, 19:36:00	236653 days, 14:03:00	30662 days, 17:29:00	49026 days, 6:17:00	0	4895 days, 16:36:00	10580	0	0	28935 days, 17:27:00	57870 days, 20:53:00	5	6	22	20	72	18
244485	cg14357089	chr10	18550033	+	324288 days, 1:11:00	248056 days, 3:04:00	76231 days, 22:07:00	262044 days, 6:04:00	3.13E-06	435425 days, 22:57:01	217484 days, 7:12:01	45199 days, 6:41:00	367850 days, 15:43:00	95089 days, 17:01:00	6373 days, 17:59:00	0	5866 days, 5:45:00	13382	0	0	64622 days, 8:56:00	50154 days, 19:42:00	4	7	24	21	71	18
245137	cg18400281	chr10	24633303	+	79684 days, 22:44:00	116632 days, 17:29:00	-36948 days, 5:15:00	-355892 days, 11:39:00	3.42E-07	14109 days, 17:42:00	45311 days, 0:11:00	20049 days, 22:28:00	227663 days, 4:06:00	687 days, 8:24:00	50526 days, 14:24:00	0	2490 days, 12:26:00	50317	0	0	38580 days, 18:56:00	42438 days, 18:31:00	5	6	25	21	72	18
245832	cg07788865	chr10	30101042	+	132654 days, 4:39:00	178716 days, 8:43:00	-46063 days, 19:56:00	-285684 days, 8:51:00	1.88E-07	186127 days, 4:54:00	8377 days, 20:06:00	22894 days, 3:46:00	307711 days, 2:47:00	123261 days, 11:34:00	51029 days, 15:29:00	0	2017 days, 19:34:00	29577	0	0	13503 days, 14:04:00	57870 days, 18:53:00	4	4	22	19	71	17
247095	cg24020157	chr10	43697521	+	374105 days, 11:25:01	438791 days, 6:07:00	-64686 days, 5:19:00	-157090 days, 18:23:00	9.20E-07	459444 days, 20:11:01	284213 days, 13:21:00	41070 days, 14:19:00	625245 days, 11:29:00	345218 days, 12:01:00	6669 days, 23:54:00	0	3983 days, 16:02:00	35313	0	0	46296 days, 20:07:00	61728 days, 21:29:00	4	6	25	18	71	18
250231	cg05893785	chr10	72201943	+	74558 days, 11:46:00	53861 days, 6:36:00	20697 days, 5:09:00	293503 days, 10:43:01	1.08E-06	108177 days, 12:46:00	50337 days, 21:51:00	11008 days, 8:13:00	74854 days, 15:48:00	29017 days, 16:13:00	1392 days, 22:15:00	0	4210 days, 18:58:00	117503	0	0	12539 days, 1:56:00	54012 days, 19:18:00	5	6	19	18	72	18
255104	cg14765206	chr10	101744219	-	452683 days, 3:04:00	369735 days, 22:51:00	82947 days, 4:13:00	199391 days, 22:32:00	1.07E-07	540804 days, 3:13:00	318271 days, 9:28:00	39728 days, 18:35:00	498044 days, 17:28:01	172636 days, 21:34:00	8371 days, 19:12:00	0	1513 days, 18:43:00	23026	0	0	61728 days, 23:29:00	7716 days, 15:11:00	8	9	23	20	72	18
256618	cg27217148	chr10	105111158	-	20857 days, 13:53:00	249901 days, 8:24:00	-41326 days, 10:26:00	-17575 days, 1:24:00	2.68E-06	280149 days, 20:42:01	134348 days, 21:13:00	32775 days, 9:02:00	347432 days, 11:48:00	18350 days, 16:08:00	39462 days, 13:42:00	0	5524 days, 16:13:00	39589	0	0	53048 days, 9:09:00	14	6	6	24	24	72	18
257967	cg08206898	chr10	116581183	+	114693 days, 3:51:00	146653 days, 17:31:00	-3197 days, 22:38:00	-233731 days, 14:43:00	2.61E-06	166886 days, 17:02:00	81487 days, 7:42:00	21273 days, 12:29:00	218929 days, 0:22:01	96795 days, 5:14:00	37165 days, 3:19:00	0	5524 days, 16:13:00	65541	0	0	62693 days, 11:38:00	42438 days, 21:31:00	7	8	23	26	72	18
258912	cg02943604	chr10	122217348	+	136246 days, 23:03:00	96802 days, 1:08:00	39444 days, 21:55:00	322834 days, 23:09:00	4.10E-06	265911 days, 20:51:00	7888 days, 19:33:00	36732 days, 16:42:00	145666 days, 17:41:00	63287 days, 11:28:00	24604 days, 11:59:00	0	6102 days, 18:54:00	43871	0	0	1929 days, 13:18:00	57870 days, 21:53:00	5	8	20	20	72	18
260916	cg10744297	chr10	131559596	-	649595 days, 6:47:00	627906 days, 0:18:00	21689 days, 6:29:00	33656 days, 14:35:00	3.77E-06	663231 days, 6:35:00	628433 days, 16:57:00	6610 days, 2:11:00	650435 days, 4:43:00	552028 days, 11:03:00	28999 days, 2:31:00	0	6102 days, 18:54:00	255631	0	0	29900 days, 2:36:00	7716 days, 11:11:00	4	6	18	18	71	18
264590	cg19171175	chr11	542109	+	656839 days, 9:04:00	615530 days, 11:09:00	41308 days, 21:55:00	64373 days, 11:03:00	2.61E-06	670788 days, 2:36:00	634501 days, 6:15:01	7262 days, 5:51:00	657151 days, 6:31:00	405287 days, 6:46:00	65405 days, 1:21:00	0	5524 days, 16:13:00	150774	0	0	50154 days, 20:42:00	30864 days, 18:44:00	7	10	20	21	72	18
268059	cg07850246	chr11	4599637	+	509185 days, 22:18:01	451975 days, 6:42:00	57210 days, 15:35:00	11770 days, 9:32:00	4.48E-06	569030 days, 3:36:00	431521 days, 22:09:00	28096 days, 1:11:00	515560 days, 6:54:01	23102 days, 4:22:00	72798 days, 12:04:00	0	6380 days, 1:08:00	59296	0	0	49190 days, 9:33:00	11574 days, 15:47:00	5	9	26	18	72	18
270000	cg20693209	chr11	13984067	-	57702 days, 22:21:00	37422 days, 23:22:00	20279 days, 22:59:00	377146 days, 16:08:00	3.97E-06	82306 days, 19:52:00	32368 days, 15:24:00	10859 days, 6:51:00	51483 days, 20:32:00	12054 days, 9:21:00	1122 days, 15:57:00	0	6102 days, 18:54:00	120082	0	0	16397 days, 4:31:00	54013 days, 0:18:00	7	10	24	23	72	18
270152	cg25783352	chr11	14993509	+	99764 days, 7:55:00	67953 days, 1:49:00	31811 days, 6:06:00	354645 days, 2:32:00	3.94E-06	221693 days, 12:18:00	59596 days, 12:53:00	22747 days, 19:15:00	98401 days, 19:06:00	22817 days, 0:26:00	20167 days, 8:33:00	0	6102 days, 18:54:00	66046	0	0	15432 days, 14:22:00	30864 days, 16:44:00	5	3	21	17	72	17
272949	cg08943494	chr11	36422615	+	433578 days, 14:24:01	525035 days, 11:03:00	-91457 days, 3:21:00	-188997 days, 23:41:00	4.83E-07	600067 days, 6:44:00	282778 days, 6:01:00	79192 days, 23:33:00	66373 days, 7:17:00	398768 days, 18:47:01	69562 days, 14:48:00	0	2971 days, 2:53:00	25366	0	0	20255 days, 5:07:00	11574 days, 16:47:00	5	7	22	22	72	18
275607	cg27471192	chr11	59015338	-	74089 days, 22:27:00	118486 days, 7:01:00	-44397 days, 15:26:00	-437698 days, 3:38:00	2.77E-07	144620 days, 0:46:00	43940 days, 10:37:00	16802 days, 6:03:00	215521 days, 13:44:00	56607 days, 5:27:00	49546 days, 2:45:00	0	2313 days, 15:31:00	32853	0	0	12539 days, 4:56:00	61728 days, 23:29:00	6	8	27	21	72	18
277100	cg00584174	chr11	63257403	+	584037 days, 1:21:00	513745 days, 17:51:00	7029 days, 3:09:00	12686 days, 15:35:00	3.67E-06	616032 days, 19:43:00	497246 days, 15:36:00	19452 days, 0:46:00	587063 days, 7:36:01	274957 days, 23:26:00	86969 days, 15:42:00	0	6102 days, 18:54:00	51684	0	0	55941 days, 20:36:00	42438 days, 18:31:00	6	7	22	21	72	18
278684	cg04948284	chr11	65313608	+	247901 days, 15:04:00	312650 days, 19:33:01	-64750 days, 19:31:00	-226820 days, 15:11:00	3.89E-06	336106 days, 17:11:01	20127 days, 10:41:00	24592 days, 9:15:00	554880 days, 18:41:00	251421 days, 3:55:01	79452 days, 2:58:00	0	6102 days, 18:54:00	18169	0	0	53048 days, 12:09:00	17	7	9	30	25	72	18
279999	cg11436362	chr11	67053929	+	199317 days, 18:25:00	254470 days, 10:24:01	-55153 days, 8:01:00	-237404 days, 0:47:00	5.20E-07	293760 days, 8:52:00	123738 days, 16:47:00	38040 days, 6:36:00	344884 days, 12:09:00	145348 days, 9:33:00	53421 days, 5:23:00	0	3080 days, 11:07:00	16637	0	0	28935 days, 16:27:00	57870 days, 20:53:00	5	8	19	17	72	18
286056	cg21002651	chr11	104905889	-	25234 days, 8:25:00	43198 days, 9:42:00	-17965 days, 22:44:00	-444399 days, 15:28:00	1.14E-06	50399 days, 0:26:00	16517 days, 22:22:00	6521 days, 9:02:00	106215 days, 18:11:00	19704 days, 22:14:00	22201 days, 18:14:00	0	4270 days, 17:36:00	136316	0	0	33758 days, 6:11:00	54012 days, 22:18:00	4	6	23	22	71	18
287012	cg03304763	chr11	112037427	+	58398 days, 8:11:00	616748 days, 2:29:00	-32765 days, 7:21:00	-54065 days, 9:42:00	1.86E-06	63063 days, 2:33:00	5086 days, 7:03:00	27569 days, 19:21:00	650693 days, 7:57:00	591710 days, 22:28:01	1677 days, 12:11:00	0	4907 days, 16:35:00	180690	0	0	16397 days, 2:31:00	19290 days, 13:58:00	5	3	20	17	72	17
287894	cg23531697	chr11	117373249	+	645552 days, 4:42:01	618521 days, 5:15:00	27030 days, 23:27:00	42388 days, 17:48:00	5.16E-06	665311 days, 2:46:00	618827 days, 16:07:00	10482 days, 7:03:00	657619 days, 0:06:01	465205 days, 19:13:00	4386 days, 18:26:00	0	6727 days, 15:16:00	220084	0	0	19290 days, 14:58:00	50154 days, 17:42:00	4	4	18	17	70	17
288700	cg26077811	chr11	119232263	-	306308 days, 1:34:00	245617 days, 22:12:01	60690 days, 3:22:00	215754 days, 10:06:00	3.35E-06	381639 days, 8:26:00	239952 days, 8:23:01	33517 days, 12:56:00	380141 days, 16:38:00	142665 days, 12:21:00	54238 days, 23:56:00	0	5942 days, 1:27:00	19965	0	0	4823 days, 1:44:00	15432 days, 14:22:00	3	4	25	21	71	17
298132	cg02522196	chr12	44226393	+	49836 days, 21:02:00	101777 days, 5:07:00	-51941 days, 15:55:00	-650800 days, 15:56:00	3.70E-10	83210 days, 12:32:00	25991 days, 18:16:00	12957 days, 15:01:00	234778 days, 5:57:00	42260 days, 8:23:00	52818 days, 8:35:00	0	120 days, 17:56:00	19817	0	0	6752 days, 2:02:00	50154 days, 19:42:00	6	5	22	20	72	18
300616	cg27448161	chr12	53472792	-	225328 days, 3:05:00	257853 days, 3:43:00	-32526 days, 23:21:00	-131300 days, 12:44:00	4.37E-06	297008 days, 19:46:00	174492 days, 7:03:00	21690 days, 23:14:00	3298 days, 5:38:00	218369 days, 11:03:00	31109 days, 20:21:00	0	6335 days, 21:49:00	63559	0	0	14:25:00	54012 days, 19:18:00	4	5	24	21	70	18
300920	cg01480384	chr12	54020711	+	9646 days, 19:46:00	138315 days, 13:38:00	-41848 days, 16:01:00	-340434 days, 7:26:01	4.79E-06	163809 days, 6:27:00	60129 days, 8:31:00	21543 days, 0:15:00	21238 days, 18:58:00	76042 days, 3:08:00	46511 days, 0:06:00	0	6557 days, 1:25:00	38336	0	0	10610 days, 2:38:00	15432 days, 13:22:00	6	5	22	17	72	18
301622	cg21376733	chr12	54891636	+	25205 days, 5:23:00	4263 days, 5:49:00	-17428 days, 19:14:00	-433933 days, 4:37:00	4.09E-07	47166 days, 21:26:00	15956 days, 6:42:00	61 days, 20:21:00	147293 days, 18:28:00	24003 days, 16:12:00	27933 days, 10:35:00	0	2720 days, 19:23:00	140468	0	0	50154 days, 22:42:00	30864 days, 19:44:00	6	9	28	25	72	18
302744	cg22667391	chr12	57843848	+	636607 days, 13:42:01	597845 days, 6:15:01	38762 days, 7:28:00	62238 days, 7:39:00	4.28E-06	654970 days, 10:59:01	562351 days, 21:55:00	15371 days, 10:23:00	63862 days, 20:18:00	508098 days, 1:24:00	39084 days, 15:34:00	0	626 days, 3:06:00	156607	0	0	27971 days, 4:18:00	30864 days, 17:44:00	5	7	20	24	72	18
302831	cg00750518	chr12	57940139	+	503017 days, 23:05:00	545232 days, 11:43:00	-42215 days, 11:22:00	-79681 days, 15:17:00	4.78E-06	578536 days, 12:54:01	394930 days, 9:35:00	40099 days, 23:38:00	652824 days, 3:02:00	469236 days, 14:31:01	50451 days, 0:49:00	0	6557 days, 1:25:00	113944	0	0	33758 days, 9:11:00	17.5	7	13	28	22	72	18
304314	cg04609875	chr12	70763703	-	516980 days, 11:31:01	442058 days, 17:28:01	74921 days, 18:03:00	154607 days, 6:18:00	3.45E-07	578504 days, 7:42:01	452275 days, 14:35:01	25235 days, 12:29:00	526778 days, 21:31:00	271051 days, 0:54:00	76654 days, 5:29:00	0	2490 days, 12:26:00	36354	0	0	38580 days, 19:56:00	46296 days, 19:07:00	4	9	26	16	70	18
304447	cg16051361	chr12	72149658	-	118226 days, 9:09:00	155480 days, 9:41:00	-37255 days, 23:28:00	-261024 days, 9:09:00	3.76E-06	251439 days, 21:45:00	61691 days, 12:07:00	36013 days, 8:08:00	325079 days, 7:25:00	9180 days, 0:38:00	58896 days, 13:37:00	0	6102 days, 18:54:00	49438	0	0	54977 days, 8:27:00	57870 days, 21:53:00	3	9	28	24	71	18
306832	cg06652329	chr12	102874566	+	11576 days, 1:42:00	174957 days, 21:57:00	-59198 days, 19:03:00	-394423 days, 11:37:00	3.90E-08	222561 days, 13:46:00	63536 days, 15:43:00	34872 days, 0:05:00	28002 days, 21:28:00	102728 days, 8:27:00	45849 days, 20:09:00	0	1083 days, 18:07:00	11156	0	0	53048 days, 9:09:00	15	4	9	25	24	71	18
307286	cg25174412	chr12	105803653	-	116663 days, 13:01:00	156197 days, 1:41:00	-3954 days, 15:32:00	-278023 days, 18:53:00	5.40E-06	182364 days, 11:49:00	48031 days, 7:59:00	33802 days, 2:17:00	254042 days, 8:53:00	94483 days, 7:25:00	45977 days, 1:59:00	0	6902 days, 21:41:00	43680	0	0	20:15:00	7716 days, 16:11:00	6	3	22	23	72	17
307437	cg12566756	chr12	106975149	-	44133 days, 9:58:00	29575 days, 18:09:00	14557 days, 15:49:00	336113 days, 10:54:00	3.03E-06	90886 days, 23:13:00	23513 days, 10:33:00	14737 days, 17:29:00	4705 days, 7:39:00	14404 days, 10:36:00	9579 days, 13:49:00	0	5866 days, 5:45:00	165417	0	0	21:25:00	46296 days, 19:07:00	5	7	21	17	72	18
307815	cg22277972	chr12	108960008	+	69877 days, 0:08:00	100205 days, 15:49:00	-30329 days, 8:19:00	-333370 days, 10:56:00	4.86E-06	10894 days, 12:25:00	32574 days, 19:48:00	13441 days, 10:04:00	184470 days, 20:57:00	72347 days, 22:57:00	31795 days, 9:09:00	0	6629 days, 20:04:00	71251	0	0	50154 days, 20:42:00	30864 days, 16:44:00	4	4	22	20	71	17
312382	cg04347477	chr12	125002007	+	377261 days, 14:23:00	49572 days, 8:57:00	-118463 days, 20:54:00	-269255 days, 17:47:00	9.74E-10	526025 days, 11:34:00	240924 days, 10:03:00	51828 days, 3:15:00	652149 days, 9:14:00	379055 days, 2:34:00	81875 days, 22:14:00	0	158 days, 17:53:00	12474	0	0	14468 days, 4:13:00	19290 days, 17:58:00	8	10	24	22	72	18
312383	cg22828383	chr12	125002191	+	254578 days, 3:08:01	326047 days, 16:24:00	-71470 days, 10:45:00	-242051 days, 14:18:01	1.86E-07	379381 days, 20:49:01	149734 days, 10:43:00	3581 days, 22:41:00	427747 days, 16:06:00	241107 days, 4:56:00	49852 days, 4:18:00	0	2017 days, 19:34:00	15958	0	0	45332 days, 6:58:00	3858 days, 11:36:00	4	6	20	20	71	18
314103	cg02043697	chr12	132269737	+	651429 days, 14:44:01	627764 days, 18:03:01	23664 days, 20:41:00	36674 days, 19:45:00	2.52E-06	665596 days, 17:28:00	636462 days, 4:26:00	6361 days, 1:31:00	658077 days, 13:29:00	536013 days, 21:02:00	28219 days, 11:47:00	0	5486 days, 1:04:00	242494	0	0	64622 days, 11:56:00	19290 days, 15:58:00	6	6	28	23	72	18
316810	cg17843665	chr13	24351673	+	420161 days, 6:19:00	36589 days, 9:37:00	54267 days, 6:08:00	136140 days, 15:21:00	3.91E-06	561403 days, 5:03:00	28797 days, 20:34:00	51138 days, 17:47:00	455503 days, 11:07:01	237685 days, 6:24:00	65252 days, 16:58:00	0	6102 days, 18:54:00	45605	0	0	491898 days, 12:33:01	578704 days, 1:53:01	2	4	19	17	69	17
317822	cg24850711	chr13	29067224	-	512586 days, 5:12:00	427967 days, 19:22:01	8461 days, 20:11:00	178114 days, 6:25:00	4.03E-06	575546 days, 14:31:00	408712 days, 9:37:01	33023 days, 9:49:00	54885 days, 17:05:00	211304 days, 6:59:00	96775 days, 20:25:00	0	6102 days, 18:54:00	28292	0	0	59799 days, 22:11:00	65587 days, 0:04:00	6	5	23	20	72	18
317858	cg16463452	chr13	29195249	+	387575 days, 13:31:00	467140 days, 7:48:00	-79565 days, 5:43:00	-184061 days, 21:02:00	3.00E-06	506959 days, 1:22:01	251006 days, 13:16:00	59162 days, 21:07:00	579064 days, 19:33:01	374977 days, 20:29:00	63370 days, 10:34:00	0	5847 days, 19:22:00	26683	0	0	65586 days, 22:04:00	30864 days, 17:44:00	5	7	27	21	72	18
317985	cg10752421	chr13	30107044	-	667668 days, 13:34:00	653699 days, 0:29:01	13969 days, 13:05:00	20964 days, 1:31:00	6.86E-07	675314 days, 13:52:00	658475 days, 22:55:00	4085 days, 3:59:00	671441 days, 19:48:00	6023 days, 16:47:00	19488 days, 9:02:00	0	3490 days, 3:43:00	322935	0	0	54977 days, 6:27:00	424383 days, 1:11:01	3	3	20	17	69	15
318011	cg08751352	chr13	30421866	+	76124 days, 12:39:00	123731 days, 11:56:00	-47607 days, 0:44:00	-45390 days, 6:45:00	5.95E-07	102852 days, 15:34:00	50266 days, 0:52:00	11823 days, 10:56:00	308073 days, 6:59:00	66415 days, 8:25:00	58021 days, 7:13:00	0	3129 days, 23:49:00	26743	0	0	27006 days, 17:09:00	57870 days, 20:53:00	3	5	25	20	69	18
320872	cg24674269	chr13	52093016	+	248303 days, 21:18:00	309209 days, 15:58:01	-6091 days, 10:08:00	-214394 days, 15:21:00	3.83E-06	314152 days, 10:04:00	114168 days, 21:22:00	38282 days, 1:46:00	473109 days, 14:35:01	239435 days, 6:22:01	64877 days, 16:04:00	0	6102 days, 18:54:00	20203	0	0	51119 days, 9:51:00	15432 days, 17:22:00	6	11	27	29	72	18
324372	cg21934772	chr13	110198949	-	604450 days, 23:36:00	538175 days, 12:48:01	66275 days, 10:47:00	114952 days, 18:09:00	3.83E-06	633505 days, 3:33:00	551415 days, 0:06:01	1779 days, 7:02:00	618523 days, 6:02:00	353639 days, 5:35:01	86085 days, 4:14:00	0	6102 days, 18:54:00	61814	0	0	45332 days, 7:58:00	30864 days, 17:44:00	5	8	22	17	72	18
324989	cg27485596	chr13	111829530	-	150783 days, 9:32:00	251222 days, 15:06:00	-100440 days, 18:27:00	-493659 days, 21:34:01	1.65E-06	301366 days, 7:23:00	68885 days, 1:51:00	4840 days, 22:17:00	506461 days, 20:15:00	15003 days, 0:27:00	93947 days, 23:41:00	0	4895 days, 16:36:00	1016	0	0	40509 days, 17:13:00	11	5	3	18	20	72	17
325987	cg21897676	chr13	113428161	-	669042 days, 18:53:00	660078 days, 23:29:00	8963 days, 19:24:00	13374 days, 0:12:00	5.07E-06	674115 days, 3:08:00	660530 days, 6:46:00	2707 days, 16:42:00	669721 days, 10:05:01	626683 days, 1:37:00	9633 days, 22:36:00	0	6719 days, 16:29:00	377632	0	0	21:25:00	10	5	5	19	16	72	18
327410	cg07244095	chr13	114833435	+	4852 days, 6:45:00	70543 days, 20:41:00	-22022 days, 22:49:00	-334960 days, 2:54:00	3.90E-06	74761 days, 10:15:00	31862 days, 5:24:00	9223 days, 11:39:00	151204 days, 15:22:00	39472 days, 8:42:00	31280 days, 19:42:00	0	6102 days, 18:54:00	109462	0	0	64622 days, 11:56:00	65586 days, 23:04:00	5	9	30	20	72	18
328532	cg19678259	chr14	23315264	+	663547 days, 2:21:01	652630 days, 1:52:00	10917 days, 0:29:00	16446 days, 20:22:00	5.22E-06	671328 days, 9:01:00	646646 days, 16:51:00	4714 days, 19:19:00	663349 days, 9:37:01	634343 days, 10:52:00	9689 days, 23:11:00	0	6727 days, 15:16:00	354042	0	0	5787 days, 14:53:00	3858 days, 15:36:00	2	9	28	26	71	18
329122	cg03047995	chr14	24601588	+	244566 days, 1:54:00	294909 days, 22:44:00	-5035 days, 14:43:00	-182802 days, 14:14:00	1.92E-07	352091 days, 3:16:00	163477 days, 15:56:00	31072 days, 12:03:00	397202 days, 13:08:00	238912 days, 4:02:00	35096 days, 1:33:00	0	2017 days, 19:34:00	27028	0	0	965 days, 3:09:00	15	5	6	25	21	72	18
330991	cg14723799	chr14	50101089	-	20767 days, 8:58:00	25375 days, 5:26:00	-4608 days, 3:32:00	-154105 days, 1:08:00	3.98E-06	30055 days, 12:01:00	12133 days, 15:11:00	3159 days, 13:17:00	33894 days, 17:59:00	19852 days, 0:22:00	3479 days, 14:18:00	0	6102 days, 18:54:00	303934	0	0	50154 days, 21:42:00	16	4	8	23	23	71	18
331090	cg10156217	chr14	50362354	+	64763 days, 21:52:00	99178 days, 19:04:00	-34415 days, 2:47:00	-392728 days, 13:59:00	5.23E-08	11041 days, 11:12:00	33000 days, 12:51:00	17274 days, 7:21:00	165773 days, 20:48:00	47419 days, 0:06:00	36000 days, 23:05:00	0	1137 days, 1:09:00	57605	0	0	15:05:00	12	4	4	26	19	71	17
335177	cg10397819	chr14	75447512	-	326386 days, 19:27:00	27395 days, 2:18:00	52435 days, 20:26:00	171474 days, 17:03:00	2.13E-06	410310 days, 4:32:01	260660 days, 18:55:01	25706 days, 0:43:00	31387 days, 9:49:00	200262 days, 21:46:01	32120 days, 8:31:00	0	51 days, 12:57:00	30202	0	0	56906 days, 10:44:00	61728 days, 22:29:00	5	8	27	29	72	18
343817	cg21575308	chr15	29763183	-	312818 days, 6:25:00	443562 days, 5:22:00	-130744 days, 1:03:00	-343436 days, 18:13:01	1.79E-06	591678 days, 5:22:00	11208 days, 9:07:00	195423 days, 12:52:00	652089 days, 16:59:01	275320 days, 2:19:00	118597 days, 22:47:00	0	4907 days, 16:35:00	5673	0	0	58835 days, 9:02:00	14	4	7	21	19	71	18
344941	cg27287357	chr15	39050013	-	59052 days, 13:51:00	521910 days, 19:32:01	68614 days, 22:58:00	122217 days, 23:08:00	2.04E-06	634966 days, 16:07:00	517692 days, 6:35:00	24950 days, 10:19:00	612809 days, 22:26:00	259049 days, 3:34:01	8837 days, 12:58:00	0	5071 days, 18:32:00	55349	0	0	30864 days, 18:44:00	11574 days, 16:47:00	5	7	24	26	72	18
348942	cg00543460	chr15	63337496	+	528610 days, 11:51:00	447572 days, 5:49:01	81038 days, 6:02:00	164375 days, 21:56:00	6.20E-08	584321 days, 18:32:00	448142 days, 10:27:00	28752 days, 17:32:00	562175 days, 21:14:00	23641 days, 5:44:00	86328 days, 13:55:00	0	1189 days, 12:45:00	32546	0	0	14468 days, 3:13:00	54012 days, 21:18:00	5	7	23	20	72	18
349327	cg18210365	chr15	65066710	+	462741 days, 10:45:00	379859 days, 19:33:01	82881 days, 15:12:00	194508 days, 17:41:00	3.12E-06	520464 days, 9:18:00	360093 days, 3:23:00	33696 days, 13:34:00	48850 days, 0:15:00	184543 days, 7:42:00	71332 days, 15:07:00	0	5866 days, 5:45:00	24098	0	0	47261 days, 7:16:00	50154 days, 19:42:00	5	7	23	18	72	18
351497	cg02430430	chr15	74532450	+	364846 days, 17:29:00	435665 days, 1:06:00	-70819 days, 16:23:00	-174682 days, 3:34:00	5.76E-08	482177 days, 18:37:01	267497 days, 10:34:00	46402 days, 15:07:00	597148 days, 10:25:01	3291 days, 3:05:00	62346 days, 21:24:00	0	1174 days, 9:52:00	29275	0	0	38580 days, 20:56:00	23148 days, 18:33:00	6	8	26	23	72	18
353312	cg26657240	chr15	81475061	+	307037 days, 13:46:00	354772 days, 23:14:01	-47736 days, 14:32:00	-141793 days, 13:29:00	2.52E-06	44184 days, 2:05:00	189019 days, 15:08:00	52313 days, 3:08:00	482712 days, 14:04:01	226736 days, 16:52:01	62649 days, 18:31:00	0	5486 days, 1:04:00	42301	0	0	30864 days, 18:44:00	54012 days, 21:18:00	7	6	26	22	72	18
353541	cg07728579	chr15	83475013	-	49379 days, 13:33:00	429784 days, 17:09:00	64010 days, 22:21:00	137029 days, 22:27:00	5.62E-07	563079 days, 22:56:01	411721 days, 7:37:00	30010 days, 19:17:00	512826 days, 9:25:00	287925 days, 12:01:00	63418 days, 3:41:00	0	3106 days, 12:49:00	45063	0	0	965 days, 4:09:00	15432 days, 19:22:00	6	8	31	26	72	18
359928	cg08576185	chr16	2055684	+	476863 days, 1:29:01	534877 days, 7:32:00	-58015 days, 17:57:00	-113462 days, 1:43:00	2.53E-06	558860 days, 16:04:00	383846 days, 20:25:01	41528 days, 16:02:00	659710 days, 5:29:00	422495 days, 23:06:00	68403 days, 20:59:00	0	5486 days, 1:04:00	63338	0	0	59800 days, 0:11:00	7716 days, 17:11:00	5	10	27	24	72	18
360581	cg00268476	chr16	2740589	-	359865 days, 20:23:00	428851 days, 19:37:00	-68986 days, 0:46:00	-172653 days, 10:25:00	3.65E-07	49196 days, 13:24:00	2418 days, 21:57:00	50426 days, 10:54:00	59087 days, 13:53:00	354421 days, 11:42:01	62846 days, 9:49:00	0	2529 days, 18:08:00	29860	0	0	54977 days, 8:27:00	15432 days, 13:22:00	4	5	21	17	71	18
362264	cg00768574	chr16	5921590	+	505011 days, 11:44:00	440357 days, 23:16:00	64653 days, 12:28:00	135256 days, 7:32:00	2.44E-06	556940 days, 20:03:00	416872 days, 18:55:01	28131 days, 19:52:00	521104 days, 19:33:01	267058 days, 23:25:01	71170 days, 2:15:00	0	544 days, 13:54:00	46162	0	0	10610 days, 3:38:00	7716 days, 16:11:00	6	7	27	22	72	18
364120	cg04699460	chr16	20751800	-	38851 days, 5:33:00	50780 days, 20:19:00	-11930 days, 9:14:00	-23194 days, 2:24:00	5.04E-06	68412 days, 19:31:00	18087 days, 21:14:00	12483 days, 19:23:00	128646 days, 5:46:00	24661 days, 18:24:00	23670 days, 15:04:00	0	6719 days, 16:29:00	193855	0	0	13	50154 days, 21:42:00	5	9	23	26	72	18
364764	cg03638781	chr16	23880664	+	74179 days, 10:05:00	115429 days, 12:25:00	-4126 days, 23:46:00	-411874 days, 3:51:01	3.11E-06	202184 days, 21:46:01	43194 days, 0:24:00	22431 days, 15:07:00	226813 days, 21:56:00	49578 days, 14:22:00	4832 days, 15:13:00	0	5866 days, 5:45:00	39739	0	0	42438 days, 18:31:00	46296 days, 19:07:00	4	8	20	19	70	18
365081	cg02983090	chr16	27437892	-	173868 days, 4:43:00	244691 days, 2:53:00	-7083 days, 16:59:00	-331140 days, 21:43:00	2.88E-06	306401 days, 23:05:00	89627 days, 11:09:00	45614 days, 5:27:00	398499 days, 21:56:00	158875 days, 11:48:00	58696 days, 17:34:00	0	571 days, 17:15:00	6546	0	0	14468 days, 3:13:00	7716 days, 16:11:00	5	4	24	25	72	17
365082	cg08282819	chr16	27437900	+	164010 days, 16:28:00	241756 days, 9:06:00	-77746 days, 7:22:00	-375552 days, 21:56:00	1.22E-06	260757 days, 7:57:01	88457 days, 23:01:00	40038 days, 7:12:00	439185 days, 15:21:00	134081 days, 17:06:00	78987 days, 2:19:00	0	4365 days, 15:03:00	3886	0	0	54012 days, 22:18:00	54012 days, 21:18:00	7	8	25	20	72	18
368083	cg26706803	chr16	50293530	-	291492 days, 7:06:00	368899 days, 12:47:00	-7741 days, 6:38:00	-231048 days, 6:33:00	2.92E-06	44113 days, 6:26:00	159891 days, 19:06:00	5335 days, 3:01:00	50415 days, 14:35:00	244326 days, 16:53:00	69491 days, 11:03:00	0	5753 days, 1:33:00	17552	0	0	44367 days, 19:49:00	42438 days, 19:31:00	5	8	21	20	72	18
369346	cg08578520	chr16	57496324	-	460863 days, 21:11:00	398152 days, 20:59:01	62711 days, 0:12:00	144200 days, 16:46:00	6.96E-07	522784 days, 16:23:00	376147 days, 8:14:01	27335 days, 14:31:00	477422 days, 22:31:00	221077 days, 1:31:01	76274 days, 13:22:00	0	3490 days, 3:43:00	41074	0	0	23148 days, 16:33:00	14.5	4	8	23	21	71	18
374309	cg03574306	chr16	85470662	+	2670 days, 8:24:00	204035 days, 9:01:01	62999 days, 14:58:00	261779 days, 14:42:01	9.30E-07	396212 days, 3:24:00	142830 days, 18:37:00	52621 days, 3:23:00	299267 days, 21:18:00	67396 days, 5:48:00	54005 days, 2:02:00	0	3983 days, 16:02:00	13417	0	0	41474 days, 4:22:00	30864 days, 15:44:00	4	5	18	15	71	18
375376	cg01787084	chr16	87371097	+	265623 days, 5:48:00	394915 days, 17:58:00	-12930 days, 17:59:00	-388944 days, 3:41:01	5.03E-07	390927 days, 8:52:00	144818 days, 3:56:00	53867 days, 4:19:00	610376 days, 12:39:00	227766 days, 18:08:01	11858 days, 20:27:00	0	3035 days, 2:23:00	3352	0	0	54012 days, 21:18:00	11574 days, 16:47:00	6	9	21	20	72	18
376935	cg10155891	chr16	88941576	+	671236 days, 10:22:01	662108 days, 8:24:01	9128 days, 1:57:00	13576 days, 10:05:00	1.95E-06	67779 days, 1:56:00	66359 days, 2:01:00	2901 days, 21:34:00	671666 days, 4:29:00	627118 days, 0:16:00	1026 days, 22:12:00	0	4982 days, 0:04:00	376021	0	0	4822 days, 23:44:00	27006 days, 14:09:00	4	6	18	15	71	18
377320	cg06615999	chr16	89178870	-	668887 days, 8:46:00	65919 days, 0:24:00	9697 days, 4:47:00	14479 days, 12:33:00	4.08E-06	678419 days, 1:59:01	654648 days, 16:55:00	5099 days, 14:24:00	668400 days, 6:58:00	618716 days, 23:21:01	1143 days, 6:25:00	0	6102 days, 18:54:00	368995	0	0	35687 days, 3:29:00	42438 days, 16:31:00	3	6	18	17	70	18
377942	cg07835443	chr16	89734986	-	269225 days, 20:44:00	383595 days, 8:16:00	-114370 days, 12:28:00	-34717 days, 22:28:00	1.24E-08	430061 days, 14:11:01	165066 days, 12:57:00	52794 days, 14:18:00	600051 days, 8:34:00	264790 days, 8:07:00	100871 days, 2:11:00	0	67 days, 9:23:00	5399	0	0	5787 days, 16:53:00	46296 days, 21:07:00	7	8	25	26	72	18
377943	cg16725984	chr16	89735184	+	498974 days, 12:24:00	591873 days, 17:12:00	-92900 days, 19:12:00	-168897 days, 0:14:00	9.45E-09	609026 days, 17:42:00	37288 days, 13:11:00	60876 days, 10:55:00	654436 days, 1:14:01	464237 days, 10:55:00	52963 days, 2:31:00	0	61 days, 14:26:00	31037	0	0	16:15:00	50154 days, 21:42:00	8	8	28	24	72	18
380117	cg00739778	chr17	2908023	-	40872 days, 8:52:00	47673 days, 8:09:00	-6801 days, 0:43:00	-151816 days, 12:47:00	5.12E-06	514399 days, 23:06:00	293276 days, 20:46:00	45539 days, 15:24:00	596812 days, 11:54:00	406146 days, 18:12:00	52908 days, 11:39:00	0	6727 days, 15:16:00	37530	0	0	28935 days, 16:27:00	15432 days, 14:22:00	3	6	19	17	70	18
384628	cg11903177	chr17	17379358	-	659184 days, 10:52:00	64015 days, 22:58:00	19024 days, 21:12:00	29030 days, 9:02:00	4.59E-06	672394 days, 11:17:00	643848 days, 9:05:00	600 days, 17:09:00	661292 days, 5:02:00	548750 days, 2:16:00	26424 days, 14:32:00	0	6430 days, 7:27:00	277452	0	0	3858 days, 13:36:00	19290 days, 14:58:00	5	3	21	19	72	17
384820	cg27407935	chr17	17723235	+	291102 days, 5:21:01	368156 days, 21:52:00	-77055 days, 7:29:00	-230377 days, 10:46:00	3.63E-08	38460 days, 17:52:00	187277 days, 18:59:00	43289 days, 23:34:00	504178 days, 22:45:00	289823 days, 14:25:01	63488 days, 8:25:00	0	1083 days, 18:07:00	17655	0	0	7716 days, 15:11:00	42438 days, 20:31:00	5	8	25	22	72	18
385496	cg08817867	chr17	19656554	+	300885 days, 23:18:01	38543 days, 23:06:00	-84554 days, 8:18:00	-243147 days, 16:34:00	2.63E-06	464214 days, 23:38:01	182299 days, 10:14:00	56663 days, 13:27:00	560379 days, 11:23:00	265145 days, 18:39:00	80946 days, 14:32:00	0	5524 days, 16:13:00	15812	0	0	46296 days, 20:07:00	38580 days, 18:56:00	6	6	26	24	72	18
386195	cg08041350	chr17	25819112	-	540973 days, 8:34:00	47079 days, 4:58:00	70181 days, 6:53:00	137322 days, 10:47:00	3.14E-07	593491 days, 18:58:00	461166 days, 2:01:00	29470 days, 8:53:00	564535 days, 20:45:00	302250 days, 17:01:00	62104 days, 17:54:00	0	2434 days, 22:35:00	44873	0	0	28935 days, 19:27:00	42438 days, 18:31:00	8	7	24	24	72	18
387242	cg00166343	chr17	29150100	-	79394 days, 3:16:00	135325 days, 18:55:00	-55932 days, 8:21:00	-500387 days, 12:03:01	2.35E-07	159401 days, 16:39:00	51403 days, 23:36:00	19516 days, 22:43:00	318582 days, 3:18:00	74648 days, 7:04:00	62061 days, 14:39:00	0	2190 days, 4:31:00	14605	0	0	61728 days, 21:29:00	19290 days, 16:58:00	7	10	25	19	72	18
387482	cg07988060	chr17	30234789	-	95503 days, 1:46:00	136279 days, 19:23:00	-40777 days, 6:23:00	-335689 days, 23:09:00	8.23E-07	162813 days, 20:52:00	61451 days, 9:05:00	21146 days, 21:23:00	239336 days, 10:14:01	93194 days, 8:23:00	36958 days, 6:42:00	0	3889 days, 14:54:00	40816	0	0	15:15:00	65587 days, 0:04:00	5	10	23	23	72	18
389274	cg26027170	chr17	37394705	+	23194 days, 8:32:00	281744 days, 18:57:00	-49802 days, 18:23:00	-189711 days, 15:19:00	4.58E-07	329405 days, 18:12:00	155609 days, 18:54:00	31288 days, 7:56:00	458593 days, 5:31:01	214635 days, 16:13:00	52879 days, 20:03:00	0	2927 days, 0:45:00	25204	0	0	31829 days, 6:53:00	15432 days, 15:22:00	4	7	23	20	71	18
390884	cg07408552	chr17	40611995	+	108149 days, 15:32:00	167240 days, 18:17:00	-59092 days, 21:16:00	-415145 days, 8:01:00	9.88E-07	183497 days, 4:46:00	51680 days, 16:48:00	3310 days, 16:29:00	377840 days, 22:23:00	84126 days, 10:37:00	71283 days, 19:21:00	0	4070 days, 14:02:00	11273	0	0	50155 days, 0:42:00	7716 days, 18:11:00	7	10	30	24	72	18
393956	cg18183624	chr17	47076904	-	327984 days, 10:43:01	233548 days, 2:49:01	94436 days, 7:54:00	331848 days, 23:54:00	1.17E-06	426276 days, 14:38:01	143491 days, 2:32:00	49572 days, 16:54:00	335240 days, 6:23:00	84797 days, 6:49:00	64744 days, 5:52:00	0	4330 days, 10:41:00	6494	0	0	41474 days, 7:22:00	7716 days, 14:11:00	7	9	23	20	72	18
393957	cg07738730	chr17	47077165	-	367722 days, 3:55:01	278817 days, 7:11:00	88904 days, 20:45:00	271385 days, 3:35:00	1.55E-06	469278 days, 23:28:01	282715 days, 5:27:00	41407 days, 12:26:00	423080 days, 5:41:01	103908 days, 13:41:00	75908 days, 6:17:00	0	4888 days, 5:59:00	12218	0	0	1 day, 0:25:00	61729 days, 0:29:00	5	10	22	23	72	18
395700	cg15672749	chr17	56297193	+	69833 days, 17:24:00	108282 days, 7:27:00	-38449 days, 9:57:00	-406742 days, 13:25:01	2.01E-06	10590 days, 2:51:00	46800 days, 23:31:00	1317 days, 21:16:00	193374 days, 17:18:00	55855 days, 8:28:00	43554 days, 1:19:00	0	5051 days, 10:18:00	46318	0	0	965 days, 1:09:00	42438 days, 19:31:00	4	8	29	21	70	18
396058	cg18942579	chr17	57915773	-	394244 days, 5:35:01	460922 days, 21:44:01	-66679 days, 7:51:00	-154041 days, 6:15:00	2.62E-06	484873 days, 17:02:00	305399 days, 0:34:01	44838 days, 22:25:00	60611 days, 5:15:00	311937 days, 4:34:00	67744 days, 4:47:00	0	5524 days, 16:13:00	36593	0	0	16397 days, 3:31:00	30864 days, 18:44:00	6	8	29	19	72	18
396570	cg24368031	chr17	60726097	-	545476 days, 0:18:00	492075 days, 5:14:01	53400 days, 19:04:00	101854 days, 5:24:00	3.43E-07	59844 days, 8:53:00	491137 days, 21:51:01	23216 days, 12:43:00	559976 days, 23:26:00	395899 days, 14:51:00	50495 days, 4:36:00	0	2490 days, 12:26:00	76711	0	0	38580 days, 18:56:00	65586 days, 22:04:00	5	9	21	22	72	18
397403	cg06940168	chr17	64370665	-	366387 days, 9:59:00	274115 days, 8:41:00	92272 days, 1:18:00	284431 days, 14:04:01	2.13E-06	442828 days, 2:35:01	273970 days, 8:34:00	45036 days, 13:38:00	372440 days, 20:47:00	190957 days, 17:07:00	46795 days, 20:58:00	0	51 days, 12:57:00	10775	0	0	15:25:00	54012 days, 21:18:00	8	8	28	19	72	18
397600	cg05059607	chr17	65488100	-	408099 days, 10:28:00	462890 days, 12:37:01	-54792 days, 21:51:00	-124230 days, 16:15:00	1.70E-06	534483 days, 22:39:01	276295 days, 14:24:00	57130 days, 15:05:00	572039 days, 22:53:01	361613 days, 0:06:01	53311 days, 18:34:00	0	4895 days, 16:36:00	53719	0	0	54977 days, 8:27:00	42438 days, 17:31:00	6	5	21	21	72	18
400198	cg11348106	chr17	75208807	-	473171 days, 8:53:00	40835 days, 17:57:00	64813 days, 21:23:00	145292 days, 23:44:00	1.84E-06	575893 days, 14:06:00	331952 days, 6:09:00	45530 days, 9:15:00	539600 days, 9:55:00	212248 days, 3:29:01	83591 days, 9:17:00	0	4907 days, 16:35:00	40515	0	0	22184 days, 4:24:00	13	5	7	21	22	72	18
403484	cg25202280	chr17	79521089	-	145295 days, 6:47:00	17049 days, 1:13:00	-25196 days, 18:37:00	-153435 days, 17:38:00	9.28E-07	193551 days, 19:44:00	113338 days, 18:33:00	17481 days, 8:26:00	216422 days, 1:54:00	136322 days, 16:08:00	26013 days, 16:27:00	0	3983 days, 16:02:00	92736	0	0	22184 days, 5:24:00	15	6	9	23	24	72	18
412101	cg24024661	chr19	1074425	-	422477 days, 5:18:01	502727 days, 13:43:01	-80251 days, 15:35:00	-171649 days, 6:37:00	2.05E-07	500072 days, 21:38:00	359058 days, 23:52:00	30558 days, 21:45:00	634526 days, 7:45:01	391715 days, 6:44:01	70206 days, 21:18:00	0	202 days, 15:21:00	30147	0	0	57870 days, 20:53:00	27006 days, 17:09:00	5	9	22	18	72	18
412102	cg02753354	chr19	1074727	-	11989 days, 8:19:00	183482 days, 15:03:00	-63590 days, 20:07:00	-407120 days, 3:37:01	4.06E-07	198458 days, 20:11:00	70797 days, 14:23:00	26895 days, 12:12:00	298119 days, 23:48:00	94301 days, 2:49:00	51632 days, 16:02:00	0	2720 days, 19:23:00	7669	0	0	9645 days, 15:29:00	14.5	5	5	23	23	72	18
414385	cg14034476	chr19	3556718	+	41179 days, 11:18:00	469943 days, 7:13:00	-58149 days, 9:47:00	-130277 days, 16:28:00	1.31E-06	489094 days, 18:35:00	324426 days, 20:56:01	36317 days, 10:11:00	635369 days, 11:58:01	358084 days, 5:58:00	63891 days, 5:18:00	0	4554 days, 19:07:00	49315	0	0	11574 days, 13:47:00	27006 days, 15:09:00	3	5	23	18	69	18
416236	cg13733403	chr19	6528291	+	597636 days, 21:19:00	562892 days, 1:33:01	34744 days, 19:46:00	59297 days, 11:37:00	1.02E-06	6277 days, 23:13:00	566631 days, 23:49:01	13934 days, 3:35:00	615805 days, 10:21:00	485326 days, 7:13:00	3458 days, 10:55:00	0	4070 days, 14:02:00	165007	0	0	14468 days, 3:13:00	27006 days, 16:09:00	6	5	20	24	72	18
418362	cg06870470	chr19	11315767	+	237707 days, 14:21:00	330291 days, 7:52:00	-92584 days, 6:29:00	-321547 days, 23:49:01	8.73E-07	438981 days, 21:13:01	11085 days, 7:44:00	61086 days, 0:13:00	467272 days, 21:14:00	171003 days, 21:24:00	85241 days, 7:48:00	0	3983 days, 16:02:00	7309	0	0	64622 days, 10:56:00	15	3	7	26	22	71	18
418448	cg12587615	chr19	11472397	+	330299 days, 5:33:00	247572 days, 9:51:00	82726 days, 19:42:00	281965 days, 9:49:00	3.30E-06	429089 days, 22:14:00	219372 days, 23:34:00	47696 days, 6:38:00	357811 days, 21:36:00	124144 days, 6:03:00	59699 days, 14:51:00	0	5942 days, 1:27:00	11023	0	0	11574 days, 15:47:00	42438 days, 21:31:00	3	7	28	22	71	18
418637	cg14188508	chr19	11685647	+	167614 days, 5:59:00	195425 days, 3:45:00	-27811 days, 2:14:00	-148112 days, 15:03:00	7.35E-07	214435 days, 4:16:00	133982 days, 22:45:00	17150 days, 9:04:00	271379 days, 9:53:00	158707 days, 21:14:00	30970 days, 5:42:00	0	3626 days, 21:45:00	80955	0	0	4823 days, 1:44:00	65586 days, 22:04:00	7	8	22	24	72	18
426200	cg02672759	chr19	39739058	-	393476 days, 7:12:01	313757 days, 20:53:00	79718 days, 10:19:00	222418 days, 0:32:00	2.93E-06	483144 days, 13:19:01	302263 days, 10:49:00	40125 days, 2:38:00	394154 days, 18:29:00	142638 days, 0:14:00	63815 days, 8:26:00	0	5753 days, 1:33:00	18853	0	0	18326 days, 4:49:00	15432 days, 17:22:00	6	10	23	24	72	18
436305	cg16744973	chr20	738228	-	198442 days, 20:25:00	236791 days, 14:31:00	-38349 days, 5:54:00	-171509 days, 4:18:00	1.11E-06	283066 days, 14:01:00	142330 days, 18:09:00	30249 days, 13:53:00	356887 days, 6:24:00	179766 days, 16:03:00	43642 days, 7:52:00	0	4234 days, 18:42:00	46583	0	0	54012 days, 20:18:00	23148 days, 16:33:00	4	7	19	19	71	18
438707	cg21132686	chr20	22795774	-	189184 days, 18:27:00	219565 days, 14:13:00	-30381 days, 4:14:00	-144286 days, 21:41:00	1.41E-06	242730 days, 16:49:00	131083 days, 5:57:00	22316 days, 3:06:00	333425 days, 6:58:01	174819 days, 2:34:00	33782 days, 1:56:00	0	4679 days, 23:36:00	71054	0	0	24113 days, 4:42:00	42438 days, 18:31:00	5	6	27	19	72	18
438948	cg01116137	chr20	25034263	+	90097 days, 18:13:00	129593 days, 20:52:00	-39497 days, 21:21:00	-342099 days, 15:33:00	1.72E-07	13745 days, 15:03:00	58355 days, 17:46:00	17457 days, 14:46:00	19853 days, 7:54:00	74373 days, 5:08:00	32752 days, 1:04:00	0	2017 days, 19:34:00	43760	0	0	1929 days, 14:18:00	42438 days, 19:31:00	5	9	23	19	72	18
440110	cg19182014	chr20	33422404	+	51234 days, 11:06:00	79728 days, 0:27:00	-28494 days, 10:39:00	-39936 days, 1:28:00	1.48E-07	89453 days, 9:45:00	39930 days, 23:51:00	8420 days, 6:01:00	156490 days, 23:16:00	48272 days, 3:41:00	32597 days, 0:57:00	0	1919 days, 15:19:00	78208	0	0	51119 days, 7:51:00	38580 days, 18:56:00	6	2	21	22	72	17
444983	cg00289503	chr20	61470028	-	301435 days, 13:44:00	360047 days, 12:26:00	-58612 days, 1:18:00	-174333 days, 5:33:00	3.15E-06	385728 days, 15:48:01	199304 days, 3:04:00	4578 days, 4:12:00	56829 days, 23:35:00	252685 days, 8:48:00	77845 days, 9:21:00	0	5866 days, 5:45:00	29380	0	0	3858 days, 16:36:00	57870 days, 23:53:00	6	8	27	25	72	18
445482	cg12352038	chr20	62114621	+	186911 days, 10:39:00	243677 days, 10:18:00	-5677 days, 9:38:00	-257311 days, 0:59:00	9.08E-07	293510 days, 21:34:01	99548 days, 11:52:00	4015 days, 18:36:00	327929 days, 2:31:00	148036 days, 13:03:00	5526 days, 15:52:00	0	3983 days, 16:02:00	13954	0	0	25077 days, 17:51:00	30864 days, 17:44:00	6	8	24	26	72	18
446391	cg04464940	chr21	18983803	-	64702 days, 12:15:00	8676 days, 17:23:00	-22065 days, 6:25:00	-268975 days, 6:44:01	2.85E-06	115610 days, 20:08:00	31906 days, 16:39:00	20405 days, 18:37:00	196195 days, 18:34:00	36389 days, 10:56:00	36829 days, 23:39:00	0	5701 days, 17:36:00	109221	0	0	13503 days, 14:04:00	3858 days, 14:36:00	6	8	21	21	72	18
446656	cg20762729	chr21	30451398	+	167733 days, 3:09:00	208015 days, 14:43:00	-40283 days, 12:26:00	-207899 days, 5:59:00	4.37E-06	279762 days, 15:31:00	97657 days, 5:14:00	34717 days, 15:51:00	340306 days, 4:48:00	114063 days, 7:23:00	50017 days, 2:05:00	0	6335 days, 21:49:00	41914	0	0	59799 days, 21:11:00	13.5	5	8	22	23	72	18
446946	cg10095801	chr21	33785988	+	651907 days, 0:05:00	619514 days, 1:51:00	32392 days, 22:14:00	50509 days, 21:05:00	2.84E-07	668381 days, 11:14:00	615336 days, 13:19:01	9915 days, 16:28:00	658008 days, 11:17:00	499116 days, 23:52:01	38650 days, 8:54:00	0	2313 days, 15:31:00	191898	0	0	59799 days, 21:11:00	61728 days, 22:29:00	4	6	21	22	71	18
447551	cg02908490	chr21	37757070	-	655747 days, 1:55:00	637500 days, 21:53:00	18246 days, 4:02:00	27971 days, 19:53:00	4.78E-06	668376 days, 17:17:00	643709 days, 16:19:01	5478 days, 21:32:00	659031 days, 13:08:01	584249 days, 15:13:00	18181 days, 0:51:00	0	6557 days, 1:25:00	282870	0	0	54012 days, 23:18:00	16	8	7	29	21	72	18
451886	cg26216618	chr22	23480087	+	61439 days, 10:32:00	105636 days, 8:43:00	-44197 days, 1:48:00	-499468 days, 21:08:00	7.84E-07	115070 days, 8:23:00	3050 days, 23:05:00	19481 days, 0:25:00	199639 days, 4:41:00	54010 days, 10:05:00	40789 days, 0:07:00	0	3758 days, 10:17:00	33275	0	0	21219 days, 17:16:00	19290 days, 15:58:00	5	9	23	22	72	18
455103	cg03141856	chr22	39529323	+	495527 days, 1:31:00	457725 days, 2:08:00	37801 days, 23:23:00	78358 days, 20:16:00	2.85E-06	546784 days, 16:21:00	380125 days, 7:32:00	28553 days, 14:34:00	516923 days, 3:13:01	3646 days, 23:33:00	41414 days, 5:15:00	0	5701 days, 17:36:00	116715	0	0	56906 days, 6:44:00	19290 days, 14:58:00	4	7	19	18	71	18
464194	cg03445896	chrX	78010565	-	550542 days, 17:29:00	459367 days, 23:28:01	91174 days, 18:01:00	178917 days, 21:08:00	1.72E-06	61858 days, 12:28:00	480740 days, 6:04:00	25240 days, 15:37:00	564462 days, 14:53:00	198630 days, 1:41:00	109114 days, 9:59:00	0	4895 days, 16:36:00	28057	0	0	44367 days, 18:49:00	3858 days, 13:36:00	6	8	24	18	72	18
