# Supplementary material for: Epigenome Wide Association and Stochastic Epigenetic Mutation Analysis on Cord Blood of Preterm Birth
Source: Int J Mol Sci. 2020 Jul 17;21(14):5044. doi: 10.3390/ijms21145044 (PMC7403978; doi:10.3390/ijms21145044)
Supplement: Supplementary file 1 [file ijms-21-05044-s001.zip › Supplementary Table S3.xlsx]

## Sheet: venn_result20727
Names	total	elements
Cruickshank et al. / Febilla et al. / Knijnenburg et al. / Present study . / Hong et al . / Wu et al. /	2	NCOR2
		PLCH1
Cruickshank et al. / Febilla et al. / Knijnenburg et al. / Present study . / Wu et al. /	3	FOXK1
		WWTR1
		RASA3
Cruickshank et al. / Febilla et al. / Present study . / Hong et al . / Wu et al. /	2	PRR5L
		IGF2BP1
Cruickshank et al. / Febilla et al. / Knijnenburg et al. / Present study	2	ITPKB
		MAD1L1
Cruickshank et al. / Knijnenburg et al. / Present study . / Wu et al. /	1	HDAC4
Febilla et al. / Knijnenburg et al. / Present study . / Wu et al. /	1	ADRBK1
Cruickshank et al. / Febilla et al. / Present study . / Wu et al. /	14	TRAF5
		TTLL11
		RGS14
		IL21R
		RASGEF1A
		DOCK6
		HMHA1
		MYLK
		PYCR2
		TMEM63A
		ATP11A
		BCL9
		FITM1
		CCDC33
Cruickshank et al. / Febilla et al. / Knijnenburg et al. / Wu et al. /	5	DNMT3A
		RPS6KA2
		LMO7
		FBLN7
		CCDC88C
Cruickshank et al. / Knijnenburg et al. / Hong et al . / Wu et al. /	1	ARID3A
Febilla et al. / Knijnenburg et al. / Present study	2	MBNL1
		DCTN2
Knijnenburg et al. / Present study . / Wu et al. /	1	ZNF598
Cruickshank et al. / Febilla et al. / Present study	6	FBXO31
		TNXB
		OTOF
		DSCAML1
		LPPR2
		N4BP3
Cruickshank et al. / Present study . / Wu et al. /	5	HCG22
		RAP1GAP2
		JAZF1
		MATN2
		CHD5
Febilla et al. / Present study . / Wu et al. /	5	CRLF3
		CHRNA6
		ATP6V0A1
		TGFB2
		C1orf127
Cruickshank et al. / Febilla et al. / Knijnenburg et al. /	14	KCNA6
		PRDM16
		TRIM2
		C7orf50
		UBAC2
		SH3RF3
		RXRA
		KCNAB2
		JARID2
		CASZ1
		SLC45A4
		CUX1
		TBCD
		INPP5A
Cruickshank et al. / Knijnenburg et al. / Wu et al. /	7	SBNO2
		SNX29
		IRAK2
		CMIP
		HNRNPUL1
		RAI1
		ZMIZ1
Febilla et al. / Knijnenburg et al. / Wu et al. /	2	SEL1L3
		RUNX2
Cruickshank et al. / Febilla et al. / Wu et al. /	25	PDLIM2
		BSN
		PRRT1
		CLIP2
		PSMB8
		GYLTL1B
		PRX
		GNG7
		TGFBR3
		ZBTB7B
		IL12RB1
		MYL4
		TAP1
		SPON1
		ITPKA
		CXXC5
		ASGR1
		PHLDB1
		PPT2
		RARA
		SEMA5B
		IL2RA
		ZC3H12D
		DAB2IP
		IRF8
Cruickshank et al. / Hong et al . / Wu et al. /	1	ITGB2
Knijnenburg et al. / Present study	8	MIPEP
		MMP14
		NDRG1
		GLI2
		FNDC3B
		CDK6
		CLU
		KIF13B
Cruickshank et al. / Present study	10	CNGA3
		IQCE
		UNC80
		CALCA
		KSR1
		MRC2
		TRERF1
		RBPMS2
		C16orf55
		TSNARE1
Febilla et al. / Present study	11	2020-09-11
		SLC8A1
		MAGI1
		FLT1
		ACP5
		SLC7A1
		CBFA2T3
		RTDR1
		ARHGEF7
		TPM1
		UBL3
Present study . / Wu et al. /	9	TIAM2
		SREBF1
		LTBP3
		ARPP21
		USP2
		ICK
		LEPROTL1
		TMEM30A
		SPRYD3
Cruickshank et al. / Knijnenburg et al. /	47	FGR
		TMEM132E
		FOXK2
		SLC38A10
		PCSK6
		LDLRAD2
		ADCY3
		PXN
		LRP5
		FAM49A
		MAST4
		SLC37A1
		TBC1D24
		CACNA1C
		IGF2BP2
		PRKCZ
		DOK1
		MYT1L
		TBL1XR1
		MUM1
		AP2A2
		VGLL4
		RPTOR
		TRIO
		BIK
		ST3GAL1
		MGAT5
		FBRSL1
		PRKCD
		ZBTB16
		ARHGEF18
		VAV2
		NFIC
		SPAG4
		SLC7A8
		SCFD2
		MYOM2
		TFDP1
		CDH1
		METRNL
		NOS3
		PRKAR1B
		ITIH1
		CDH23
		HIVEP3
		FBXL18
		H2AFY
Febilla et al. / Knijnenburg et al. /	35	ZZEF1
		RBPMS
		OSBPL10
		NCK2
		ESR1
		FLI1
		ART4
		KIF5C
		EXT1
		LPIN2
		MED12L
		TRAK1
		ERICH1
		PWWP2B
		MCPH1
		AUTS2
		PTPRE
		MPP7
		GRB7
		TANC1
		NEAT1
		STARD3
		RAB11FIP3
		DHRS9
		GPR179
		SPTB
		MSI2
		TSPAN9
		CTBP2
		RGMA
		P4HB
		GMDS
		PLAC8
		LARP4B
		TNR
Knijnenburg et al. / Wu et al. /	6	F2RL1
		LTBP1
		AUH
		LINC00299
		FBXW11
		CCDC92
Knijnenburg et al. / Hong et al	2	RAPGEF3
		SMG6
Cruickshank et al. / Febilla et al. /	113	CNTNAP1
		LOC401097
		DLEU7
		SYNGAP1
		TMEM184A
		LMNB2
		BHMT
		FAM163A
		VSIG8
		MEGF10
		GABBR1
		ZNF710
		RAB11FIP4
		GALNT9
		MIR762
		KCNQ1
		PLXND1
		HLCS
		2020-09-05
		EGFL8
		COL11A2
		TULP1
		GP1BB
		C11orf66
		FCHO1
		PSD4
		ARPP-21
		NTF3
		STRA6
		PTPN6
		TTC22
		PRPH
		ALKBH5
		PSMC5
		DAGLA
		LOC100188949
		FLJ43390
		GPR68
		LOC100133545
		AMPD2
		LOC100130872-SPON2
		IFITM1
		HIST1H2BO
		HIST1H3J
		MYO1D
		CYFIP2
		ZBTB46
		FBXO2
		RBMS1
		NRXN2
		EFS
		SLC44A4
		HIVEP1
		GRK6
		ABCG1
		PLEKHB1
		MYO1C
		ZC3H3
		ADORA2A
		PACS2
		RCC2
		HOXA3
		BRF1
		KAZALD1
		ZC3H12A
		FAM18A
		HLA-DMB
		HOXA10
		C8orf42
		CCDC42B
		EBF1
		LRFN2
		SPTBN5
		CLCN7
		FAM166B
		TMEM40
		2020-09-09
		SLC35F3
		COL13A1
		FBXO44
		BCL7C
		EPPK1
		DPF3
		C10orf41
		SKAP1
		FAM101A
		EBF4
		HIVEP2
		HNRNPF
		PACSIN1
		NODAL
		WNT10A
		IQSEC1
		PLBD1
		TTF1
		CD5
		APCDD1
		RARG
		NHSL1
		FGFBP2
		C6orf132
		C1orf89
		HLA-B
		ARHGEF17
		LOC440839
		C1orf204
		DLGAP2
		DDR1
		PVT1
		SLC2A9
		CSF1R
		NOTCH1
		C3orf21
Cruickshank et al. / Wu et al. /	28	PNMA1
		ERG
		PLEKHG7
		AHNAK
		TMEM140
		GALNT2
		LOC146880
		OAS2
		C11orf45
		SMG7
		SLC41A1
		CFLAR
		ERI3
		CARD11
		MUC1
		PLXNB1
		PLCH2
		SCD5
		MGAT5B
		NR5A1
		SH3TC1
		LRRK1
		ARAP2
		GEMIN7
		HOXB6
		GPC2
		SNAP47
		ATP6V0E1
Cruickshank et al. / Hong et al	2	PITPNM2
		FAM125B
Febilla et al. / Wu et al. /	20	CACNB1
		ATP2B2
		SLC11A1
		TSLP
		ACAP2
		TEAD3
		SLCO3A1
		FGF20
		C15orf62
		GRHL2
		RAPGEF1
		HPS3
		ANKRD11
		FLNB
		CREBL2
		SSPO
		TG
		NIN
		ABCA4
		ZNRF1
Present study	82	SIDT1
		SCAND3
		TET3
		ARF6
		IPO9
		NFIA
		LPAR4
		PRKCB
		KIAA0020
		SEC14L1
		EPGN
		STON1
		MAP3K7CL
		VMP1
		LRRC56
		CREB3
		C7orf49
		CASP1
		ISCU
		UBE2D3
		BC039523
		ITK
		TEKT2
		MIR548O2
		COL9A3
		CCDC3
		SH3TC2
		POU6F2
		NCKAP1L
		CBX7
		DNAAF2
		AK093356
		IFNL4
		CACNB2
		PDE4B
		LOC100287944
		EFCC1
		MYCL1
		PITPNC1
		KCNMB4
		STON1-GTF2A1L
		ENPP3
		RPL31P11
		IRF2BP2
		DAB1
		SFSWAP
		KCTD5
		RAB21
		LEFTY1
		TCRBV20S1
		KIAA1217
		GARNL3
		HRASLS5
		MGMT
		ACSS1
		SLC8A1-AS1
		DNMBP
		PPAPDC1A
		NEMF
		PTH2R
		CNTNAP2
		AP3S1
		ACSF3
		MFSD12
		THUMPD1
		FAM84A
		FAM189A1
		BRPF3
		CCDC146
		INHBC
		B3GALNT2
		MLPH
		EVA1C
		BC039356
		NDC1
		PRKCA
		BC016361
		SCN5A
		BTG3
		LOC653739
		BCKDHB
		WDSUB1
Knijnenburg et al. /	658	TMEM239
		CD44
		SAMD4A
		HAUS2
		GPR98
		PDHA1
		PXYLP1
		ITPK1
		HSD17B2
		GALNT3
		GP1BA
		CCDC177
		UQCR11
		TOP1MT
		FAM134B
		GPSM2
		USP47
		PHYHIP
		SPN
		PCSK1
		TNS3
		PI4KB
		ENDOU
		FFAR3
		SORL1
		SUGCT
		PUF60
		SHC1
		STX8
		MIR3679
		PCGF3
		BAHCC1
		PIK3R5
		LINC00460
		ANXA3
		GTPBP1
		OGDH
		CECR2
		C1QTNF3
		ZNF83
		C15orf52
		CST7
		MKNK1
		TRA2B
		CD38
		CCNY
		RBPJ
		C7orf33
		EMC1
		CASC8
		MIR4472-2
		QDPR
		C1orf216
		CCDC43
		ULK4
		TRAPPC9
		LYZL4
		PREP
		SERPING1
		MCU
		GCLM
		CPEB3
		TMEM120B
		ABHD2
		WDFY2
		ADAM19
		EMC8
		C2orf57
		CEP120
		C3orf52
		DPYD
		HTR3A
		TMEM33
		LSM12
		WDR20
		PLD1
		SULT1C2
		LZTS1-AS1
		MIR1281
		COG3
		ARAP1
		CBFA2T2
		STK40
		CCR3
		STAT5A
		UBE2W
		GFI1
		LINC00938
		CYSTM1
		ACVR2A
		TRAF2
		HS1BP3
		BCL2L15
		PARG
		HAPLN4
		POLD2
		TNFAIP6
		ZMIZ1-AS1
		LINC01342
		RDX
		CELSR3
		LOC100132735
		BOD1
		NFRKB
		COL23A1
		LINC00636
		PREX2
		CREBBP
		DSTYK
		LOC407835
		RPN1
		ABCC2
		SGK1
		NOP10
		DLGAP1
		ZNF827
		LYPD8
		RFNG
		SPAG9
		ANTXR1
		CECR5
		KIAA0319L
		SPIDR
		XXYLT1
		PTCHD3P1
		ERMARD
		ITGA6
		SC5D
		SMCO4
		RASSF9
		FAM180B
		NET1
		TOX
		LGALS12
		HMBOX1
		IBA57
		ROPN1L
		DLEU2
		ARHGAP26
		FBXL5
		TNFRSF10C
		GXYLT2
		HIPK3
		LOC652276
		FCRLB
		POR
		MIR4435-1HG
		ENPP2
		AREG
		VPS53
		COG8
		RUFY1
		NAA15
		CPO
		DAG1
		LOC283710
		ARHGAP10
		RCC1
		RALB
		GSK3B
		ALAS1
		DUSP10
		PKP2
		AMPD3
		PYURF
		LRRFIP1
		TK2
		TRIM16
		BMP10
		GPR110
		CHMP4C
		EPCAM
		CD109
		PRDM1
		SLC25A24
		EFR3B
		FGD2
		TBC1D16
		ZNF608
		SLC25A30
		SLC25A42
		IFFO1
		MCCC1
		GGT1
		SRCAP
		PARP15
		NUCKS1
		ATP5A1
		FCGRT
		HEATR5A
		CMSS1
		C5orf63
		UNC119B
		CTNNBIP1
		FOXN3
		IL10
		CHD7
		OLFM4
		RHOU
		FTO
		ADHFE1
		EPC2
		TACC3
		APOPT1
		NLK
		EIF3A
		MYEOV
		LOC646214
		CHD2
		NECAP1
		SIRPA
		CSGALNACT1
		HOXB-AS1
		CREB1
		CELF2-AS2
		CLEC7A
		SORCS3
		ZHX2
		ARMC9
		RNU5E-1
		STAT5B
		SLC39A13
		TRIM11
		ARFIP1
		HM13
		TCERG1
		KLF5
		NRG3
		RNASEH2B
		ABCC5
		ADORA3
		ABL1
		UBE2H
		KLHL18
		SMPD3
		SWSAP1
		MTHFD1L
		C2
		FBP1
		WDR27
		MACC1
		CXorf21
		HTRA1
		ID2
		RB1
		DHX29
		POP1
		DLG5-AS1
		PDXDC1
		SRC
		RBFOX2
		ADTRP
		C16orf93
		MYOZ3
		RAB11FIP1
		NADK
		LRRC20
		SLC7A7
		LCP2
		RSPRY1
		GLS
		ALDH1A3
		PEX5
		HSPA7
		NAV3
		MAP1LC3A
		PLGRKT
		SYPL1
		PPP4R2
		SLC39A10
		MCUR1
		FTCDNL1
		RPS6KA1
		ICE2
		LIPC
		B3GNTL1
		NCOA2
		BNIP3L
		PITRM1
		AGPAT5
		USP12
		ADAT1
		CRYL1
		LINC00114
		FAM46C
		TMEM167B
		CHRM3
		KDM2B
		CDKL5
		ADNP
		ATP8A2
		SNTB1
		LOC648987
		UBE3A
		LRRC27
		TSGA13
		NFKBIA
		ZNF821
		MPRIP
		KLF13
		ZFAND2A
		C16orf70
		GSE1
		SFXN4
		ZNF703
		S100A12
		COL8A2
		UBTF
		SPRED2
		LPIN1
		MKS1
		POU2F1
		ERRFI1
		APC
		SUCNR1
		PIK3R6
		DOCK7
		GNA12
		FAM20C
		B4GALT5
		BRD3
		LINC01354
		MGRN1
		ROR1
		PGS1
		PLAUR
		SESTD1
		CSNK2A1
		SUMO1P1
		BRAF
		LPCAT1
		SYT16
		C2orf40
		UBR4
		TP53RK
		SLC16A1
		NDEL1
		USP8
		TYMP
		INSIG1
		ERC1
		CH25H
		COMT
		TMEM206
		XYLT1
		C15orf61
		ZNF519
		MEF2C
		UCK2
		IQGAP2
		MYB
		ANKS1A
		DNAH14
		PXT1
		AFF1
		TBC1D14
		S100P
		BTLA
		CCDC12
		AMBRA1
		DEPDC7
		LOC284454
		RAD51B
		DPYSL2
		SDCCAG8
		ST7-AS2
		MFSD6
		TBC1D31
		GINS3
		GPR116
		LAPTM4A
		MAB21L3
		CROCC
		SMIM3
		CRY2
		ACTL6A
		BCO2
		RMDN2
		MAML2
		NUP93
		FAM150B
		ASB8
		ZC3H7A
		JADE3
		LINC00623
		NEDD4
		CCDC141
		RBBP9
		CNOT4
		ZBTB38
		CAMSAP3
		SLC26A8
		LPGAT1
		PLTP
		TAF1B
		SNX29P1
		USP49
		ALDH4A1
		SAMD13
		SLC40A1
		COPG1
		WDR43
		ZNHIT1
		ANKAR
		NNAT
		ANKRD28
		PIGV
		USP10
		HOXB3
		FGD4
		LY86
		GSAP
		PRKD3
		NRP2
		PRDX1
		TCF12
		ACTR1A
		TMEM44
		AEBP2
		DTX1
		IL1RL1
		RASGEF1C
		MIR548N
		CD58
		TOM1L2
		RNASE10
		ZW10
		FAM171A1
		PLAGL1
		CTF1
		NOL3
		ZBED3-AS1
		AQPEP
		TARS
		PGLYRP2
		TOB1-AS1
		LINC01343
		MYOF
		SOX12
		GSN
		CPSF3
		SENP6
		SRBD1
		MPO
		LINC01101
		ARHGEF3
		PRKAR1A
		AP1M1
		MAML3
		MAN1C1
		CMC1
		MYCT1
		GPN3
		ARSB
		LINC00502
		TNK2
		DENND4A
		LRRN4
		SPRED1
		RNASE9
		SHPRH
		P2RY2
		SIPA1L1
		HK1
		SFMBT2
		CRIM1
		AOX2P
		IQCG
		MIR4679-2
		PFKFB3
		MIR30C2
		TMEM55B
		FCAMR
		IL1RAP
		CD9
		RBL2
		ASRGL1
		FTSJ3
		TAF4
		LINC01132
		PMFBP1
		LOC441242
		ERI2
		PRPSAP1
		LINC01122
		AMACR
		PRKAG2
		DRG1
		CHKA
		RAB31
		CPQ
		KPNA1
		DOT1L
		ZBTB8A
		CAMK2G
		BRD1
		CMAHP
		ATF7IP
		CCDC8
		LOC100630918
		LINC00870
		TMEM154
		FAM179A
		ZBTB14
		LRRC47
		FAM200B
		TPRA1
		CUL1
		LGALSL
		CD34
		BCO1
		SLC25A25
		GAPVD1
		DPH5
		LIPM
		ARHGAP31
		ASGR2
		ST3GAL2
		CAMKMT
		TBL1X
		EPB41
		BDH1
		NPHP4
		LATS2
		SESN3
		ARL9
		STARD6
		TPRG1
		CD59
		TRAPPC12
		ARHGAP18
		ITGA2B
		SERINC5
		KLF7
		SLC5A6
		SNX27
		XPNPEP1
		RAP1B
		CDK5RAP1
		CDH9
		PPM1B
		LRCH2
		WDR25
		METTL22
		ALDH3A1
		LOC401127
		HPCAL1
		ANKFY1
		SERPINB6
		OGFOD3
		RIBC2
		KCTD6
		VPS28
		LINC01107
		COPS8
		CD63
		VPS18
		LDB2
		AP4S1
		SF3B1
		CALCRL
		HMGCL
		AGRP
		ANKRD29
		CDKN2AIP
		SGMS2
		TBX19
		PAX8
		SMIM14
		TGFA
		TRIP4
		ZFYVE26
		RAB5C
		STAU2-AS1
		EIF4E3
		PRMT3
		CLEC12A
		ARHGEF1
		CEP41
		C11orf91
		C18orf25
		SPATA5
		DOCK5
		VCAM1
		IFNGR1
		CRTC3
		LMTK3
		ZNF337
		REEP4
		DYRK1A
		DNAJB12
		PPP2R2B
		FCER2
		GPD2
		ZFR
		MAD2L1BP
		MGC15885
		CCDC150
		NPTX1
		RNMTL1
		RRM2B
		CUEDC1
		HSD17B12
		PCSK5
		SCRIB
		FZD6
		CITED4
		POLR2C
		GPX3
		SIK3
		TIMP2
		PDE8B
		SEMA5A
		CABLES1
		LINC00578
		STC2
		PRDM15
		S100A7A
		LCN2
		ELL2
		FAM193B
		KCTD12
		LYZL2
		TRPC4AP
		LINC00886
		F3
		KIF21B
		SYNPO
		UBE3C
		INHBA-AS1
		PRSS57
		WNK1
		OLA1
		ETV6
		RFX7
		UAP1
		FAM110B
		AOAH
		MARVELD2
		VSIG10
		PGD
		ARHGEF10
		CCDC112
		HSPG2
		ADCY9
		TM4SF5
		SUCLA2
		ANO6
		NPC1
		TRIB2
		MYBPHL
		TUBB1
		KAT6B
		LOC643339
		CEACAM3
		USP3
		NADK2
		BIRC3
Cruickshank et al. /	723	PAX7
		TFIP11
		ZDHHC8P
		OSTCL
		CYP11A1
		PBX4
		STOX1
		ARRB2
		ADCY7
		CPXM2
		ZBTB12
		PEBP4
		RNU5E
		SLC2A5
		CCDC97
		GRM2
		NOC4L
		PCDH21
		SERPINF1
		TSC22D1
		LHFPL2
		SPPL2B
		OXT
		RUNX3
		WDR69
		GRK5
		PDIA3
		PRDM2
		HSPA1L
		EGOT
		CCDC124
		DNAH17
		ABR
		PLEC1
		A2ML1
		HS3ST1
		FBXL14
		TNNT3
		AIRE
		HDAC7
		SHBG
		RARRES3
		PLXNA1
		KLHL30
		C4orf52
		TPCN1
		HBZ
		ASIP
		MIMT1
		ORAI3
		EMILIN1
		CDH15
		CRHBP
		GCK
		MYBPC1
		RNF39
		GSTM4
		DEPDC5
		PRSS21
		SLAMF1
		KCNE3
		ACOT7
		PCDHGA1
		MAN2B1
		KRT37
		KDM4B
		SEZ6
		CD300A
		IPO13
		AGTRAP
		FBXO36
		PBX1
		MYLK2
		E4F1
		RBM38
		SNORD115-17
		C17orf72
		LILRP2
		WNT3A
		FXYD2
		DISC1
		CATSPER4
		C10orf104
		FMN1
		GGN
		AHRR
		C19orf6
		HOXB5
		SNORA74A
		GTSF1
		MLL3
		CMYA5
		NDRG2
		APBA2
		MUC2
		GDF2
		NAT15
		SNORD115-18
		ANO9
		FAM3B
		ESPNL
		SCRN1
		HLA-DOA
		CYB561
		MAP1LC3B
		FAM193A
		ACAP3
		HIST1H3E
		CD177
		EPB49
		LOC100130987
		MIR1260
		SECTM1
		RASAL3
		BCL7A
		LGALS9B
		FAM41C
		WNT9A
		LOC285847
		PCDHGA5
		IL29
		ESRP2
		NCKAP5L
		WNK4
		BEGAIN
		RUNX1T1
		DKK4
		C4orf10
		ZNF740
		E2F4
		SFRS13B
		UBE2Q2
		SYT7
		GCNT2
		FKBP5
		PRMT1
		PEF1
		IGFN1
		GPRIN2
		KCNK7
		PDE4D
		EPHB3
		KCNMB3
		PRDM13
		TMC6
		MAP3K6
		SLC19A1
		SLC16A11
		LOC283050
		TINAGL1
		SHANK3
		FRMD4A
		PARK2
		GPR124
		SLC9A3R2
		TMEM132A
		C1orf125
		TSPAN2
		LAMA3
		HIST1H2BE
		ICAM2
		LFNG
		PCDHGA4
		CLIC1
		WDR82
		C8orf73
		HYAL2
		ABI3
		POLD4
		PTGER4
		CCR7
		RHBG
		CATSPER2P1
		LOC646982
		ARMC2
		CYTH4
		IGSF21
		MMP11
		CCDC74A
		HORMAD2
		MCF2L
		INPP5F
		IQGAP3
		PARVG
		MDGA1
		VAC14
		GRAMD1B
		SIAH2
		YWHAG
		PPIH
		BGLAP
		URGCP
		ZIC5
		KIAA0415
		PLD2
		SASH1
		SSBP3
		CYP4F22
		HS3ST3B1
		WDR33
		MRM1
		HOXA2
		PPP1R14B
		SBF1
		LRP1
		MOV10L1
		VPREB1
		KIAA0182
		ITGBL1
		TAP2
		OSGIN1
		ICMT
		GALR3
		SFTA3
		FXR2
		CLASP1
		MIR130A
		CAPN2
		CHI3L2
		C10orf71
		PLCD1
		MXRA7
		SMARCA4
		MCOLN3
		TMEM91
		SKI
		TNKS1BP1
		PLSCR1
		UBXN11
		APOLD1
		FAM154A
		CPEB4
		BCKDHA
		TCTEX1D4
		KLB
		VAMP5
		PLEKHG5
		ANKRD44
		DUSP27
		MKL2
		PATL2
		CRIP2
		C21orf29
		NKX6-2
		RGL2
		LIG1
		SNCG
		CD247
		SPTBN2
		C17orf98
		SLC15A3
		COL16A1
		MRGPRE
		MTA1
		CANT1
		TFAP2A
		FAM163B
		BRE
		PHF15
		MAFB
		FABP6
		DGKA
		PEG3
		KRT19
		EIF2C2
		TSPAN18
		TNFRSF18
		AKAP8L
		SLC35C1
		PDIA3P
		ARG2
		PCYOX1L
		TP53
		SFTPC
		KIAA0125
		C6orf145
		LAMB2
		PTGFRN
		ATXN1
		STRA13
		DCAKD
		FAM178B
		SELM
		ANKRD33B
		LOC100129637
		SSH3
		C20orf199
		MICAL1
		PCDHGB3
		TSNAX-DISC1
		NEURL1B
		WRAP53
		DCHS1
		TPPP
		INPP4A
		SBSN
		IL12B
		POMC
		ZNF418
		C12orf23
		LOC400931
		ELMO3
		CKMT2
		SEMA6B
		MYLK3
		MON1A
		SLC30A3
		FLJ42875
		C2orf39
		ANKRD13D
		P2RX7
		CDC42EP1
		ARHGEF19
		HGFAC
		ME1
		PTDSS2
		PLEKHA6
		WNT7B
		SFXN5
		AOX1
		MAFF
		AANAT
		BCAS3
		EVPL
		PVRL4
		C1orf104
		HEPACAM
		EVL
		SOX18
		SYNGR1
		CDK3
		ARID1A
		C17orf106
		PCDHGA3
		CAPZB
		LOC728875
		ESPNP
		CACNA1G
		SPHK2
		C1orf43
		RYBP
		SLC6A17
		FAM171A2
		SAFB
		LOC728264
		GNB3
		AVP
		TMTC2
		SNORD12B
		PRAGMIN
		TEX264
		VAMP2
		TNIK
		HPN
		LRP3
		TLX3
		MATR3
		ZBED3
		CPSF4L
		UCN
		USF2
		MMRN2
		IRF1
		SNHG4
		SYNPO2
		DNAJB1
		C8orf51
		GNAI2
		HMHB1
		CHSY1
		KCNT1
		DIP2C
		SLC22A18
		NOS1
		EPHA2
		CREB3L3
		CYP2U1
		CCR9
		BIN3
		C6orf103
		HMOX2
		ZBTB22
		SYT2
		ANXA13
		HIF3A
		LOC404266
		HLA-E
		GSTA4
		BTBD17
		PNMT
		MIR192
		STEAP3
		PKLR
		CCNI2
		SFRS16
		SNORD1A
		RAP1GAP
		KCNH2
		TRAF3
		TBX2
		CXCR2
		ZIM2
		SND1
		CHD3
		LRRC4
		EEFSEC
		NACC2
		CCDC102A
		CUGBP2
		GIP
		ATG4B
		TECR
		RNF144A
		AKNAD1
		TRH
		PRRT4
		GRIK4
		ANTXR2
		MYL6
		TAPBP
		RUNX1
		C2orf81
		KRTAP10-2
		ESRRG
		EFNB3
		OGG1
		LRRC25
		CDR2
		NLGN2
		PROKR1
		ZCCHC24
		EGFL7
		DYRK2
		FAM169A
		NR3C1
		FCN2
		GPR133
		RNU5D
		TCEA2
		MAP4K1
		RCOR2
		LEF1
		TXNRD2
		PITX2
		ZNF236
		TH
		MTFMT
		LCK
		MAP3K8
		P2RX5
		DGKZ
		CNRIP1
		SULT1A1
		SF3A2
		SDC4
		TMC8
		LTB
		NGB
		DUOXA1
		RBM20
		HLA-A
		ZCCHC7
		MYH10
		STX11
		TBXAS1
		TSPAN16
		ARMC7
		ITPR1
		LOC145814
		NFKBID
		DDAH2
		PLEKHA7
		ALPPL2
		VWF
		NCRNA00111
		MFSD10
		RBM46
		ARRB1
		LRRC15
		PCDHGB2
		ADAMTSL2
		ABCG4
		CALY
		C12orf63
		TNS1
		KCNH6
		PPP1R10
		KIR3DL1
		FAM170B
		TRIM9
		C16orf88
		RPH3AL
		CTSD
		PFKM
		GNL1
		SEMA3B
		ADSSL1
		COL25A1
		NEDD1
		LOC390595
		LHPP
		HIAT1
		C2orf58
		RFX8
		MUC4
		ABLIM2
		SEMA4B
		RQCD1
		AIP
		DHRS3
		ATG16L2
		HSDL1
		VPS13D
		LASP1
		HEG1
		FBXL19
		ATG9B
		TRIP13
		AGAP2
		ADA
		CCDC93
		KCNK4
		USP37
		GMEB2
		PDCD2
		RNF165
		NUP210
		KCNQ1DN
		CACNA2D3
		DUOX1
		LY6G5C
		FGFRL1
		SH2D4A
		C6orf146
		KRT2
		C16orf74
		PRKCE
		EML2
		CREB3L2
		GLIS1
		PHRF1
		CCNO
		SIGIRR
		BRD9
		MIR330
		PCDHGA2
		RHPN1
		P4HA2
		FAM195B
		LOC729176
		CLDN15
		ADAM6
		PDE2A
		CMTM2
		MIR145
		CNR2
		MGLL
		CRYGD
		CLDN5
		PTPRN2
		ZNF597
		CYP26C1
		C14orf73
		S100A4
		LOXL2
		CLIC3
		PCGF5
		NFIX
		SBF2
		CADM3
		GAL3ST2
		RNASE3
		LOC389333
		ZNF238
		IL17REL
		LPHN1
		MIR1207
		GP9
		LHX3
		GPR4
		EXPH5
		RUSC1
		SDK1
		SERPINB1
		FOS
		FIGNL1
		LIMCH1
		SLC18A2
		KCNQ2
		MTMR7
		AMH
		PRODH
		SLC43A1
		CXCL12
		C15orf53
		ZNF346
		CD52
		PCDH24
		ABAT
		KIAA1549
		SLC16A3
		IRX2
		MICAL3
		CELSR1
		ALX4
		SLC9A1
		UBAP2L
		C6orf10
		SPNS3
		CD81
		TCIRG1
		STAP2
		CHD4
		C19orf33
		LGALS9C
		ADAP1
		BANP
		OGFR
		ZNF34
		CAMK1D
		GDI2
		SPON2
		C2CD2
		GABRA4
		SALL4
		CDKN1C
		TCERG1L
		FAM194A
		ACTB
		OTUD7B
		TMEM163
		HCCA2
		NKAIN2
		MYO7A
		C6orf201
		GNA14
		INSR
		LCN6
		MOXD2
		PLLP
		MIR194-2
		HHIP
		FOXN1
		BTBD19
		MTSS1
		FERMT1
		ZNF575
		VSX2
		CAMKV
		CCND2
		QSOX1
		C21orf84
		RTKN
		ART3
		UPP1
		MIRLET7A3
		DMRTB1
		HIST2H2BA
		UNC93B1
		ZFHX3
		LOC285375
		NES
		C19orf76
		HRNBP3
		ENC1
		ZBTB44
		VOPP1
		TUBGCP6
		C13orf15
		CLDND2
		HIST2H2BF
		WNT4
		RFX4
		CLUAP1
		C9orf167
		SNORD12
		AGAP1
		SNORD115-19
		ALDH3B1
		KCNJ5
		PDSS2
		PYGM
		LOC221122
		GNGT2
		TTLL8
		CYP46A1
		MCF2L2
		AHNAK2
		SALL3
		C18orf34
		DOK7
		MYOM3
		TMEM101
		CALHM2
		TMEM90B
		PCDHGA6
		KCNN4
		SDCBP2
		JPH3
		CLCF1
		GPR39
		RAB43
		FAM180A
		DENND2D
		ATPAF2
		LRPAP1
		MIR1259
		CDH5
		DAAM1
		PCDHGB1
		SUSD1
		WDR66
		ZPBP
		CDK10
		HLX
		LOC643719
		SERHL
		PRR3
		PLSCR3
		PSMB9
		C10orf26
		OSBPL5
		NRSN2
Febilla et al. /	476	PTPLA
		SMARCD3
		PSTPIP1
		ERAL1
		PFKP
		MOSC1
		IGF1
		AHSA2
		FRAS1
		ANGPTL5
		CCNI
		FNBP1L
		CACNA2D1
		ZEB1
		C4orf22
		CYTH1
		ZFP161
		STK16
		AGPAT1
		TMEM39A
		AK3L1
		KIAA1949
		ATXN10
		ELOVL5
		RAB19
		OR8D4
		LOC151534
		LRGUK
		LOC283999
		KIAA0528
		LOC100128788
		SLC1A7
		RAPGEF6
		GOLGA3
		LOC642852
		SLC6A15
		BOP1
		DNM1
		PANX3
		PPM1K
		CAMTA1
		FAM159A
		DUSP5
		PXDN
		RHEB
		THRB
		TFR2
		SPTBN1
		EXOC2
		MFN2
		PPFIA3
		FGF6
		AFAP1L1
		MED27
		TMEM14C
		DAPP1
		LRRC10
		GPR171
		SPG20
		VTCN1
		KCNQ5
		CNOT6
		FAM54B
		PRR5
		DNHD1
		VAMP4
		CAMSAP1
		GPR132
		OPA3
		ACSF2
		SCHIP1
		GNAO1
		CXCR7
		PPM1H
		C20orf173
		NCOA3
		KIF25
		KIAA1161
		SIRT2
		OR2H1
		MEIS1
		NSD1
		LOC643923
		PTCRA
		TRAM2
		KRT77
		SIX2
		SOX10
		LRBA
		NAPB
		SVIP
		DSE
		GPR135
		OR8K1
		MIP
		LOC100129550
		ZNF561
		NAV2
		FGF12
		INPP5B
		MICA
		CHN2
		FAM78A
		TMEM72
		TRPM2
		NUDT22
		MIR889
		CUL3
		RNF43
		CHST2
		ASB1
		YJEFN3
		UNKL
		WWOX
		KRT78
		MDFI
		AMOTL2
		C17orf62
		MRFAP1
		GALNT10
		ATP2A3
		MRO
		TEAD4
		ZNF862
		AVL9
		DTX4
		RERE
		MTMR9L
		FMNL1
		QSOX2
		LGALS2
		DOCK1
		SHC2
		FOXD2
		SLC12A7
		THAP4
		MAN1A1
		ZNF835
		HOTAIR
		SIGLEC15
		ZDHHC1
		PUM2
		PM20D1
		SLC22A23
		KIAA0513
		SH3BP2
[truncated: 410 more rows]

## Sheet: Foglio1
6	2			6	2
5	3			5	5
5	2			4	24
4	2			3	68
4	1			2	291
4	1			1	2019
4	14
4	5
4	1
3	2
3	1
3	6
3	5
3	5
3	14
3	7
3	2
3	25
3	1
2	8
2	10
2	11
2	9
2	47
2	35
2	6
2	2
2	113
2	28
2	2
2	20
1	82
1	658
1	723
1	476
1	71
1	9
