# Supplementary material for: Epigenome Wide Association and Stochastic Epigenetic Mutation Analysis on Cord Blood of Preterm Birth
Source: Int J Mol Sci. 2020 Jul 17;21(14):5044. doi: 10.3390/ijms21145044 (PMC7403978; doi:10.3390/ijms21145044)
Supplement: Supplementary file 1 [file ijms-21-05044-s001.zip › Supplementary_TableS2.xlsx]

## Sheet: Foglio1
Table
ARTICLE	TARGET_ID	UCSC_REFGENE_NAME	UCSC_REFGENE_GROUP	RELATION_TO_UCSC_CPG_ISLAND
Cruickshank et al.	cg04347477	NCOR2;NCOR2	5'UTR;5'UTR	Island
	cg22828383	NCOR2;NCOR2	5'UTR;5'UTR	Island
	cg26385126	NCOR2;NCOR2	Body;Body	S_Shore
	cg03821418	NCOR2;NCOR2	Body;Body	S_Shelf
Febilla et al.	cg22828383	NCOR2;NCOR2	5'UTR;5'UTR	Island
	cg04347477	NCOR2;NCOR2	5'UTR;5'UTR	Island
Knijnenburg et al.	cg24697460	NCOR2;NCOR2	Body;Body	N_Shelf
Wu et al.	cg04347477	NCOR2;NCOR2	5'UTR;5'UTR	Island
	cg22828383	NCOR2;NCOR2	5'UTR;5'UTR	Island
Wang et al.	cg04347477	NCOR2;NCOR2	5'UTR;5'UTR	Island
Present study	cg04347477	NCOR2;NCRO2	5'UTR;5'UTR	Island
	cg22828383	NCOR2;NCRO2	5'UTR;5'UTR	Island
Cruickshank et al.	cg18623216	PLCH1;PLCH1	5'UTR;1stExon
	cg11932158	PLCH1	TSS200
Febilla et al.	cg26690511	PLCH1	TSS200
	cg11932158	PLCH1	TSS200
	cg18623216	PLCH1;PLCH1	5'UTR;1stExon
Knijnenburg et al.	cg07480762	PLCH1	TSS200
Wu et al.	cg18623216	PLCH1;PLCH1	5'UTR;1stExon
	cg23541926	PLCH1	TSS200
	cg11932158	PLCH1	TSS200
	cg26690511	PLCH2	TSS201
Cruickshank et al.	cg26690511	PLCH1	TSS200
	cg11932158	PLCH1	TSS200
	cg21262198	PLCH2	TSS201
Present study	cg18623216	PLCH1;PLCH1	5'UTR;1stExon
Cruickshank et al.	cg19336198	FOXK1	Body
	cg27496570	FOXK1	3'UTR	N_Shore
Febilla et al.	cg04160501	FOXK1	Body	S_Shore
	cg22218709	FOXK1	Body	S_Shore
Knijnenburg et al.	cg26136772	FOXK1	Body	N_Shelf
	cg25344401	FOXK1	Body	N_Shelf
Wu et al.	cg04160501	FOXK1	Body	S_Shore
Present study	cg22846826	FOXK1	Body	S_Shore
	cg22218709	FOXK1	Body	S_Shore
	cg04160501	FOXK1	Body	S_Shore
Cruickshank et al.	cg14557185	WWTR1;WWTR1;WWTR1	Body;Body;Body	Island
	cg15043384	WWTR1;WWTR1;WWTR2	Body;Body;Body	Island
Febilla et al.	cg02056062	WWTR1;WWTR1;WWTR3	Body;Body;Body	Island
	cg15043384	WWTR1;WWTR1;WWTR1	Body;Body;Body	Island
	cg14557185	WWTR1;WWTR1;WWTR2	Body;Body;Body	Island
	cg19483007	WWTR1;WWTR1;WWTR2	Body;Body;Body
Wu et al.	cg19483007	WWTR1;WWTR1;WWTR2	Body;Body;Body
Present study	cg19483007	WWTR1;WWTR1;WWTR2	Body;Body;Body
Cruickshank et al.	cg11288831	RASA3	Body	S_Shore
	cg00814985	RASA3	Body	N_Shelf
Febilla et al.	cg24781299	RASA3	Body	Island
	cg20691608	RASA3	Body	N_Shelf
Wu et al.	cg20721135	RASA3	Body	N_Shore
Present study	cg07244095	RASA3	Body	N_Shelf
Cruickshank et al.	cg08943494	PRR5L;PRR5L;PRR5L;PRR5L;PRR5L	5'UTR;5'UTR;1stExon;5'UTR;Body
	cg00220721	PRR5L;PRR5L;PRR5L;PRR5L	5'UTR;5'UTR;TSS200;Body
Febilla et al.	cg22117805	PRR5L;PRR5L;PRR5L;PRR5L	5'UTR;5'UTR;TSS200;Body
	cg07136133	PRR5L;PRR5L;PRR5L;PRR5L	5'UTR;5'UTR;TSS200;Body
	cg00220721	PRR5L;PRR5L;PRR5L;PRR5L	5'UTR;5'UTR;TSS200;Body
	cg08943494	PRR5L;PRR5L;PRR5L;PRR5L;PRR5L	5'UTR;5'UTR;1stExon;5'UTR;Body
Wu et al.	cg08943494	PRR5L;PRR5L;PRR5L;PRR5L;PRR5L	5'UTR;5'UTR;1stExon;5'UTR;Body
	cg00220721	PRR5L;PRR5L;PRR5L;PRR5L	5'UTR;5'UTR;TSS200;Body
	cg22117805	PRR5L;PRR5L;PRR5L;PRR5L	5'UTR;5'UTR;TSS200;Body
Wang et al.	cg08943494	PRR5L;PRR5L;PRR5L;PRR5L;PRR5L	5'UTR;5'UTR;1stExon;5'UTR;Body
Present study	cg08943494	PRR5L;PRR5L;PRR5L;PRR5L;PRR5L	5'UTR;5'UTR;1stExon;5'UTR;Body
Cruickshank et al.	cg07738730	IGF2BP1;IGF2BP1	Body;Body	S_Shore
Febilla et al.	cg07738730	IGF2BP1;IGF2BP2	Body;Body	S_Shore
	cg18183624	IGF2BP1;IGF2BP3	Body;Body	S_Shore
	cg08125539	IGF2BP1;IGF2BP4	Body;Body	S_Shore
Wu et al.	cg18183624	IGF2BP1;IGF2BP5	Body;Body	S_Shore
	cg07738730	IGF2BP1;IGF2BP2	Body;Body	S_Shore
Wang et al.	cg18183624	IGF2BP1;IGF2BP3	Body;Body	S_Shore
Present study	cg18183624	IGF2BP1;IGF2BP4	Body;Body	S_Shore
	cg07738730	IGF2BP1;IGF2BP2	Body;Body	S_Shore
