# Supplementary figures and images for: Epigenome Wide Association and Stochastic Epigenetic Mutation Analysis on Cord Blood of Preterm Birth
Source: MDPI journal article supplement (doi:10.3390/ijms21145044), 2020-07-17

REVIGO Gene Ontology treemap

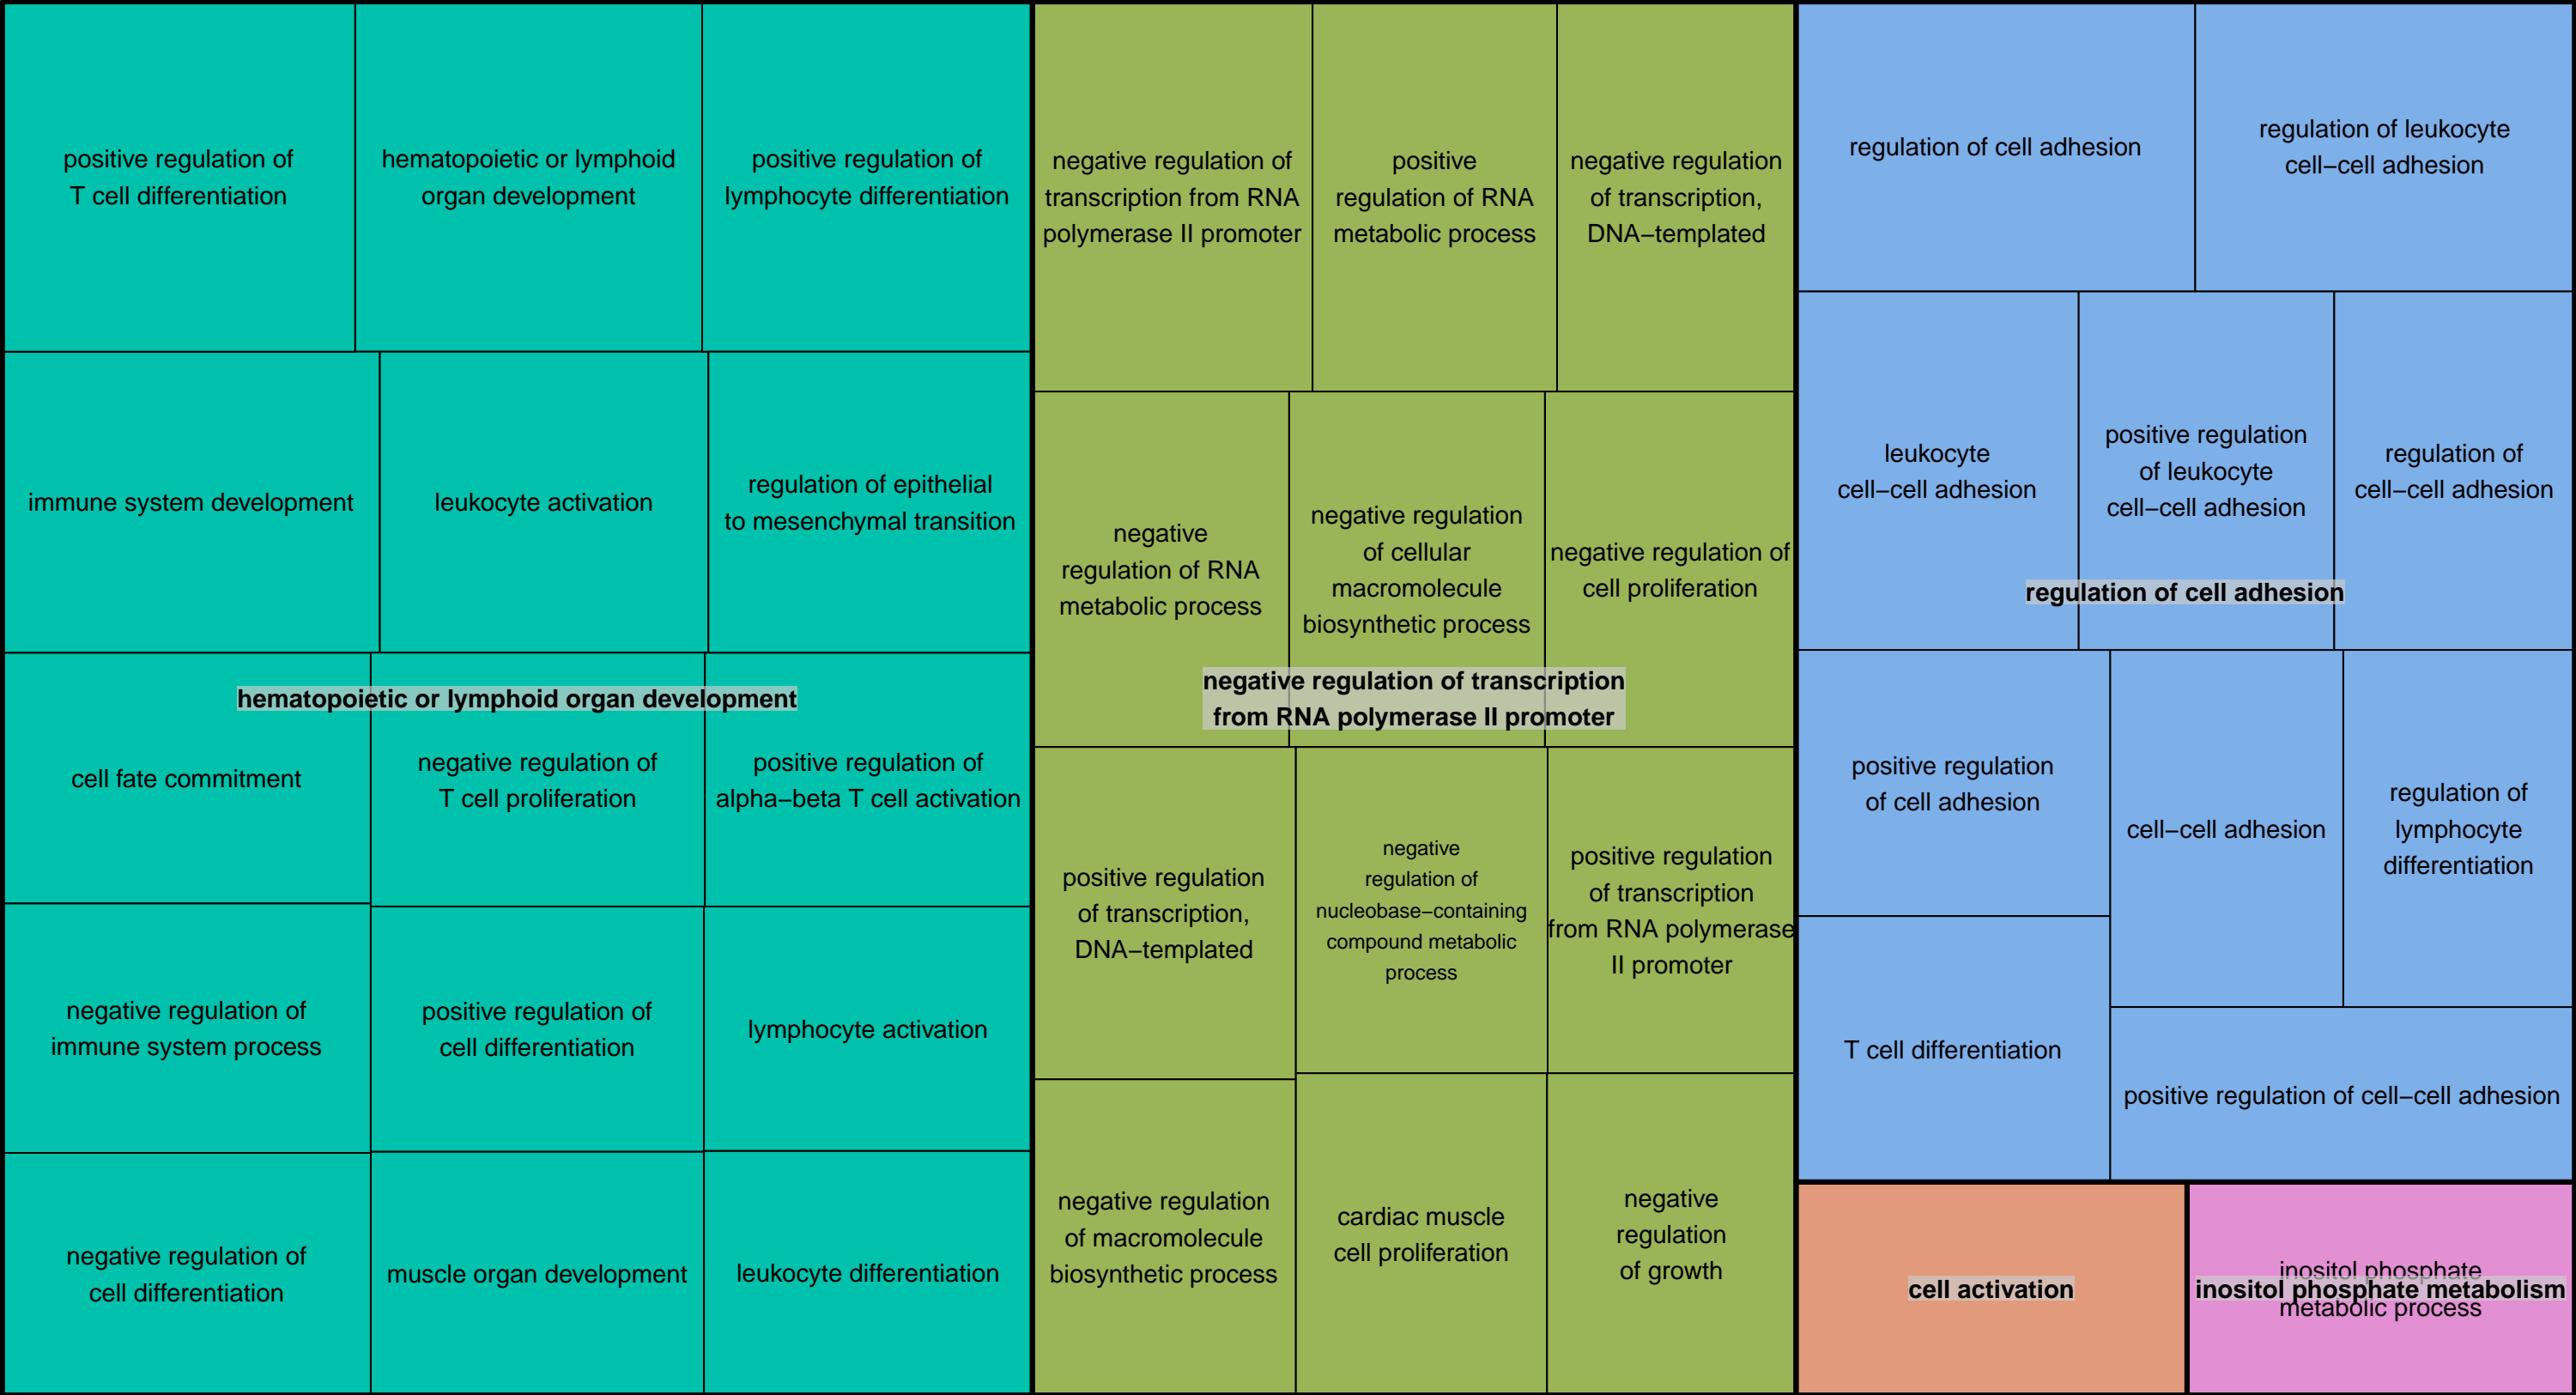

Supplement: s1 [file s1]

CD4T

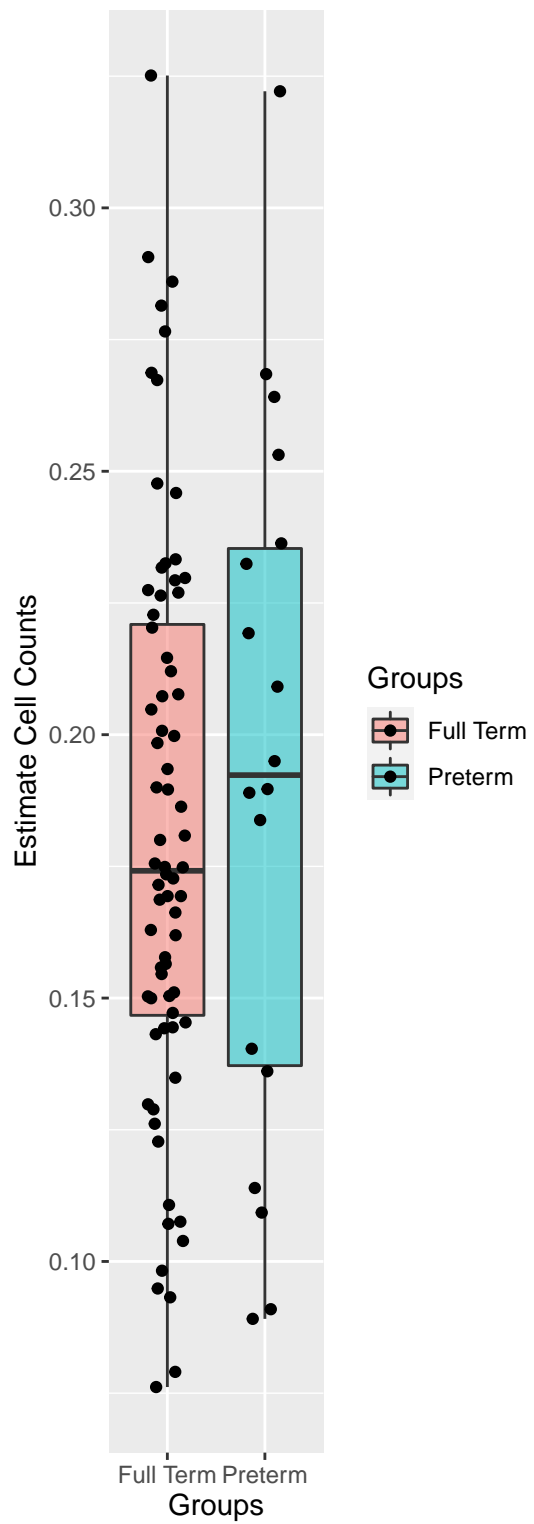

CD8T

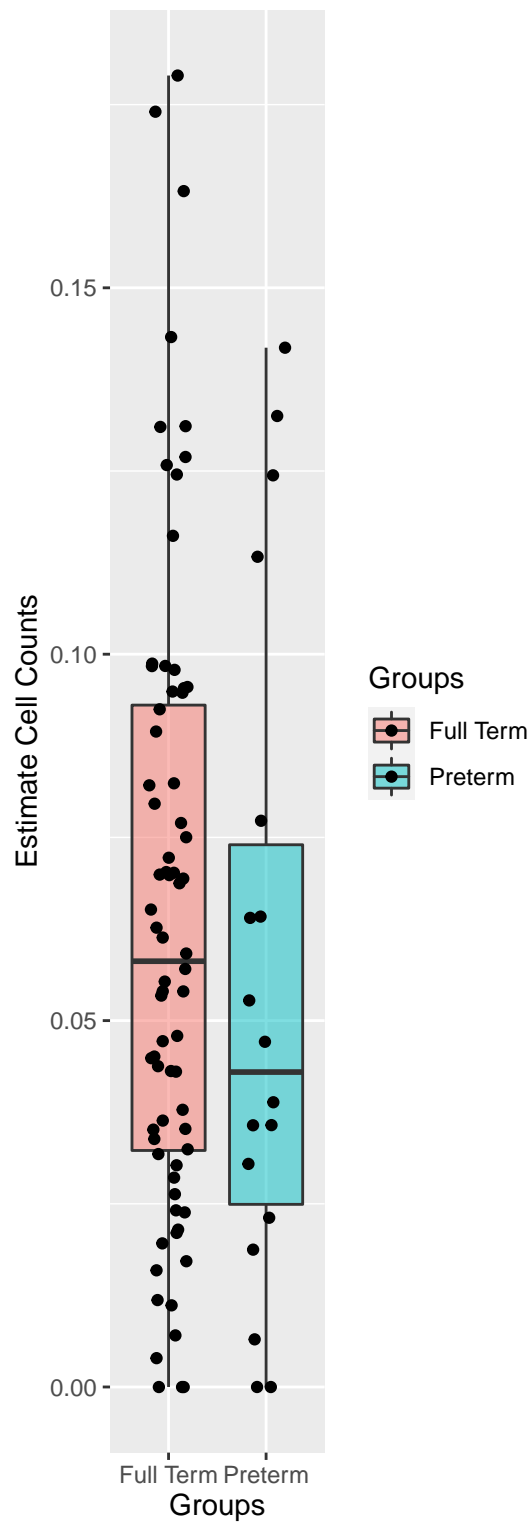

Monocytes

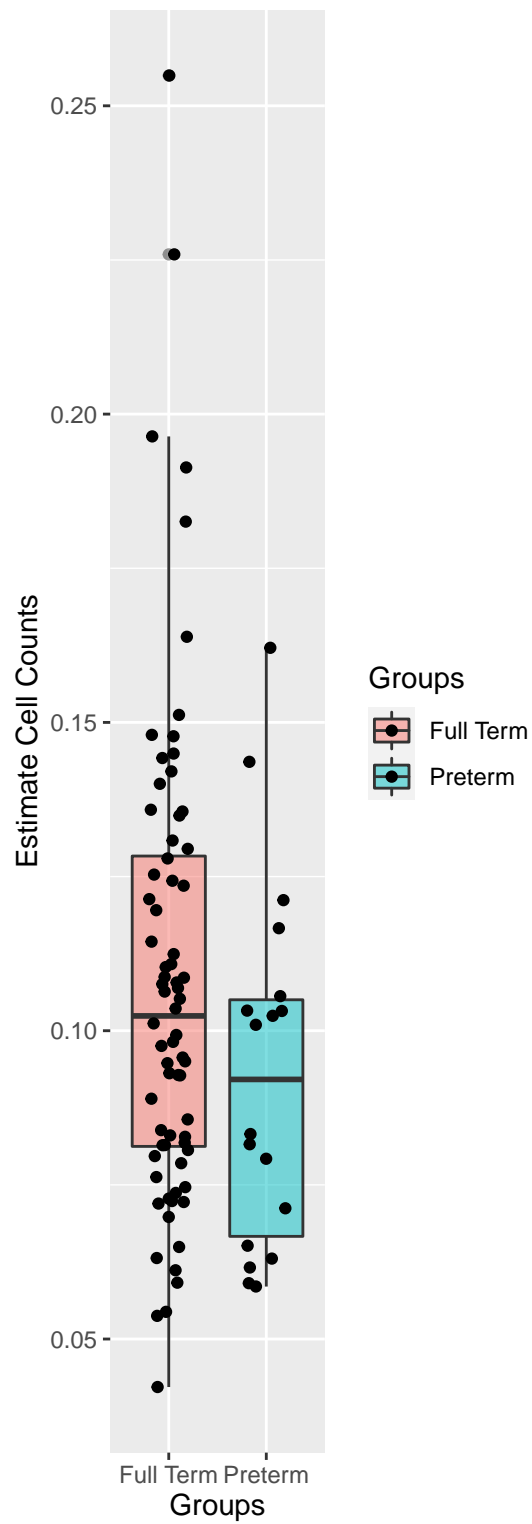

Plasmablasts

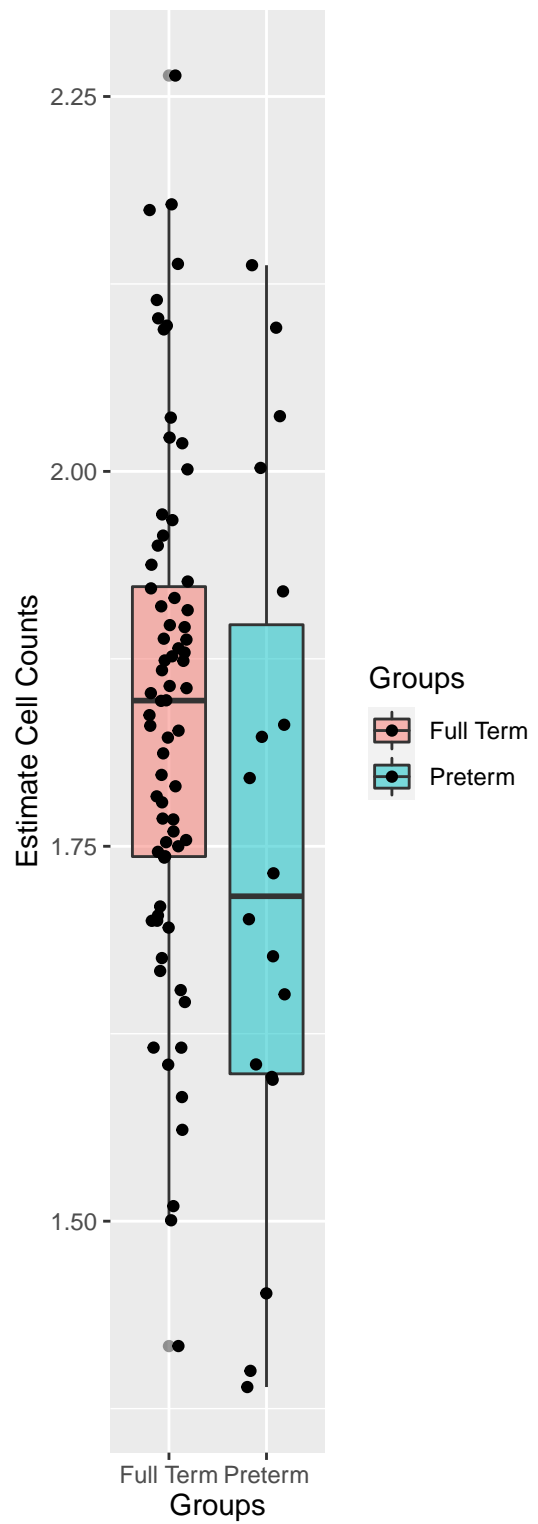

Supplement: s1 [file s1]
